# Supplementary material for: Monitoring of a Broad Set of Pharmaceuticals in Wastewaters by High-Resolution Mass Spectrometry and Evaluation of Heterogenous Catalytic Ozonation for Their Removal in a Pre-Industrial Level Unit
Source: MDPI journal article supplement (doi:10.3390/analytica3020014), 2022-04-22
Supplement: s1 [file s1]

---

**Supplementary Material**

*for*

# **Monitoring of a broad set of pharmaceuticals in wastewaters by high-resolution mass spectrometry and evaluation of heterogenous catalytic ozonation for their removal in a pre-industrial level unit**

**C. Nannou<sup>1,2</sup>, E. Kaprara<sup>3</sup>, S. Psaltou<sup>4</sup>, M. Salapasidou<sup>5</sup>, P.-A. Palasantza<sup>5</sup>, P. Diamantopoulos<sup>5</sup>, D. A. Lambropoulou<sup>1,2</sup>, M. Mitrakas<sup>3</sup>, A. Zouboulis<sup>4\*</sup>**

<sup>1</sup> Laboratory of Environmental Pollution Control, Department of Chemistry, Aristotle University of Thessaloniki, GR-54124 Thessaloniki, Greece; [chnannou@chem.auth.gr](mailto:chnannou@chem.auth.gr); [dlambro@chem.auth.gr](mailto:dlambro@chem.auth.gr)

<sup>2</sup> Center for Interdisciplinary Research and Innovation (CIRI-AUTH), Balkan Center, Thessaloniki GR-57001, Greece; [chnannou@chem.auth.gr](mailto:chnannou@chem.auth.gr); [dlambro@chem.auth.gr](mailto:dlambro@chem.auth.gr)

<sup>3</sup> Department of Chemical Engineering, Aristotle University of Thessaloniki, GR-54124, Thessaloniki, Greece

<sup>4</sup> Department of Chemistry, Aristotle University of Thessaloniki, GR-54124 Thessaloniki, Greece

<sup>5</sup> AKTOR S.A., Wastewater Treatment Plant of Touristic Area of Thessaloniki "AINEIA", N. Michaniona, Thessaloniki, Greece

\* Correspondence [zoubouli@chem.auth.gr](mailto:zoubouli@chem.auth.gr)

## Contents of the Supplementary Material

### Section S1. Description of the four distinct operating sections of the pre-industrial level unit

### Section S2. Supplementary Tables

|                                                                                                                                                                                                                                                                     |    |
|---------------------------------------------------------------------------------------------------------------------------------------------------------------------------------------------------------------------------------------------------------------------|----|
| <b>Table S1</b> Specifications of the membrane module used.....                                                                                                                                                                                                     | 4  |
| <b>Table S2</b> Main physicochemical characteristics of materials tested as catalysts.....                                                                                                                                                                          | 4  |
| <b>Table S3</b> Sampling Points.....                                                                                                                                                                                                                                | 4  |
| <b>Table S4</b> Physicochemical properties of the studied PPCPs .....                                                                                                                                                                                               | 5  |
| <b>Table S5</b> Instrumental Parameters in LC–Orbitrap MS/MS .....                                                                                                                                                                                                  | 12 |
| <b>Table S6</b> LC–Orbitrap MS/MS data for the target PhACs .....                                                                                                                                                                                                   | 13 |
| <b>Table S7</b> Summary of mean recoveries (%R), precision (%RSD <sub>R</sub> , n=6) and method quantification limits (MQL) in the two different matrices and matrix effect study results on effluents.....                                                         | 18 |
| <b>Table S8</b> Occurrence (ng/L) for PhACs detected in the effluents of the studied WWTP. Concentrations (ng/L) are calculated as the minimum, maximum and average from all sampling campaigns .....                                                               | 21 |
| <b>Table S9</b> Measured effluent concentrations (ng/L) for the PhACs (i) before (P0), (ii) after the conventional disinfection (by ozonation), and (iii) after different treatment stages (P1, P2, P3) of the pre-industrial level unit (catalyst: zeolite). ..... | 24 |
| <b>Table S10</b> Measured effluent concentrations (ng/L) for the PhACs (i) before (P0), (ii) after the conventional disinfection (by ozonation), and (iii) after different treatment stages (P1, P2, P3) of the pre-industrial level unit (catalyst: PET). .....    | 26 |

### Section S3. Supplementary Figures

|                                                                                                                                                                  |    |
|------------------------------------------------------------------------------------------------------------------------------------------------------------------|----|
| <b>Figure S1</b> Diagram (a) and view (b) of wastewater treatment plant “AINEIAS” .....                                                                          | 28 |
| <b>Figure S2</b> Variation of BOD <sub>5</sub> , COD, SS, T-N, NH <sub>4</sub> -N, NO <sub>3</sub> -N and T-P at the entrance of WWTP for 2018-2020 .....        | 29 |
| <b>Figure S3</b> Variation of BOD <sub>5</sub> , COD, SS, T-N, NH <sub>4</sub> -N, NO <sub>3</sub> -N and T-P at the treated outflow of WWTP for 2018-2020 ..... | 30 |
| <b>Figure S4</b> Detailed flowchart of the pre-industrial level unit.....                                                                                        | 31 |
| <b>Figure S5</b> Photograph of the pre-industrial level unit.....                                                                                                | 32 |

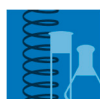

---

**Section S1. Description of the four distinct operating sections of the pre-industrial level unit****(a) Post-filtration**

The first treatment stage includes a fixed-bed column (D=480mm, H=3000mm) packed with sand and activated carbon (i. 10 cm sand 1,0-1,6 mm, ii. 80 cm sand 0,4-0,8 mm and iii. 40 cm activated carbon) for the filtration of the secondary effluent of WWTP that serves the removal of suspended solids and the improvement of quality characteristics of treated waste, prior to its introduction to the following sections of the unit.

**(b) Ozone dilution**

The treated wastewater, after the first treatment stage, is inserted to a custom-made porous PTFE hollow fiber membrane module (provided by Markel Corporation, PA, USA) used for the contact/dissolution of ozone gas to the liquid phase. The specifications of the membrane are listed in Table S1. To achieve maximum efficiency in ozone dissolution to wastewater hollow fiber membrane operates in a dead-end function, so that the gas phase is completely transported to the liquid one and maximum ozone exploitation is achieved. In addition, the ozone gas is introduced to the shell side and the liquid phase to the lumen side of the hollow fibre membrane.

**(c) Catalytic ozonation**

Catalytic ozonation is performed in a fixed-bed column (D=200mm, H=3000mm) packed with an appropriate solid material, applied as potential catalyst for the ozonation treatment of CECs (i. 10 cm sand 1,0-1,6 mm, ii. 100 cm catalyst). Materials tested as catalysts were zeolite and PET as they presented the highest efficiency in catalysing CECs' ozonation when applied in laboratory scale experiments in a pilot unit operating correspondingly to the pre-industrial unit. Table S2 summarizes the main physicochemical characteristics of these materials.

**(d) Biological stabilisation**

The last treatment stage of the pre-industrial unit includes a sand/activated carbon column (D=200mm, H=3000mm) for the final biological stabilisation of treated wastewater (i. 10 cm sand 1,0-1,6 mm, ii. 70 cm sand 0,4-0,8 mm and iii. 40 cm activated carbon). This step aims to further improve the quality characteristics of the treated wastewater through the removal of CECs' transformation products.

The secondary (biologically treated) effluent of WWTP is introduced into the pilot unit at a flow rate of 200 L/h, while ozone gas supply is provided by the existing generator, used to disinfect the treated wastewaters before disposal to the sea, which can produce 190 g O<sub>3</sub>/Nm<sup>3</sup>.



---

**Section S2. Supplementary Tables****Table S1** Specifications of the membrane module used

| Membrane                                       | PTFE Hollow Fiber |
|------------------------------------------------|-------------------|
| Inner Diameter (mm)                            | 1.47              |
| Outer Diameter (mm)                            | 1.88              |
| Density (g/cm <sup>3</sup> )                   | 0.97              |
| Porosity (%)                                   | 53                |
| Pure Water Flux (L/min/m <sup>2</sup> @ 2 bar) | 180               |
| Water Entry Pressure (bar)                     | 1.93              |
| Maximum Pore Diameter (μm)                     | 0.741             |
| Mean Pore Diameter (μm)                        | 0.589             |
| Minimum Pore Diameter (μm)                     | 0.52              |
| Length, L (m)                                  | 0.96              |
| Effective Contact Area (m <sup>2</sup> )       | 4.8               |
| Number of fibers                               | 846               |

**Table S2** Main physicochemical characteristics of materials tested as catalysts

| Catalyst                             | PET   | Zeolite |
|--------------------------------------|-------|---------|
| PZC                                  | 6.8   | 6.2     |
| IEP                                  | 2.2   |         |
| S <sub>BET</sub> , m <sup>2</sup> /g | 21    |         |
| Pore volume, mL/g                    | 0.164 |         |
| Granule size, mm                     |       | 0.8-2.5 |

**Table S3** Sampling Points

| Name                            | Description                                                                                                                                                 |
|---------------------------------|-------------------------------------------------------------------------------------------------------------------------------------------------------------|
| WWTP Influent                   | Influent wastewater                                                                                                                                         |
| WWTP Effluent                   | Effluent wastewater after conventional disinfection (simple ozonation), discharged at the receiver                                                          |
| P0-Secondary effluent           | - Secondary treatment effluent wastewater before conventional disinfection (simple ozonation) and<br>- Influent wastewater to the pre-industrial pilot unit |
| P1-1 <sup>st</sup> Bed effluent | Effluent wastewater after the post filtration (1 <sup>st</sup> Fix-Bed) in the pre-industrial pilot unit                                                    |
| P3-2 <sup>nd</sup> Bed effluent | Effluent wastewater after the catalytic ozonation (2 <sup>nd</sup> Fix-Bed) in the pre-industrial pilot unit                                                |
| P4-3 <sup>rd</sup> Bed effluent | Effluent wastewater after the biological stabilization (3 <sup>rd</sup> Fix-Bed) in the pre-industrial pilot unit                                           |

**Table S4** Physicochemical properties of the studied PPCPs

| PPCPs              | CAS No      | Molecular formula                                                              | MW (g/mol) | Water solubility<br>(mg/L, 25°C) | logK <sub>ow</sub> | pK <sub>a</sub> |
|--------------------|-------------|--------------------------------------------------------------------------------|------------|----------------------------------|--------------------|-----------------|
| <b>Antibiotics</b> |             |                                                                                |            |                                  |                    |                 |
| Amoxicillin        | 26787-78-0  | C <sub>16</sub> H <sub>19</sub> N <sub>3</sub> O <sub>5</sub> S                | 365.10     | 3430                             | 0.87               | 2.8; 7.3        |
| Ampicillin         | 69-53-4     | C <sub>16</sub> H <sub>19</sub> N <sub>3</sub> O <sub>4</sub> S                | 349.11     | 1.01×10 <sup>4</sup>             | 1.35               | 2.5; 7.3        |
| Azithromycin       | 83905-01-5  | C <sub>38</sub> H <sub>72</sub> N <sub>2</sub> O <sub>12</sub>                 | 748.51     | 7.09                             | 4.02               | 8.7             |
| Ciprofloxacin      | 85721-33-1  | C <sub>17</sub> H <sub>18</sub> FN <sub>3</sub> O <sub>3</sub>                 | 331.13     | 3×10 <sup>4</sup>                | 0.28               | 6.1             |
| Clarithromycin     | 81103-11-9  | C <sub>38</sub> H <sub>69</sub> NO <sub>13</sub>                               | 747.48     | 0.342                            | 3.16               | 9.0             |
| Erythromycin       | 114-07-8    | C <sub>37</sub> H <sub>67</sub> NO <sub>13</sub>                               | 733.93     | 1.44                             | 3.06               | 8.9             |
| Isoniazid          | 54-85-3     | C <sub>6</sub> H <sub>7</sub> N <sub>3</sub> O                                 | 137.06     | 1.4×10 <sup>5</sup>              | -0.70              | 1.8             |
| Levofloxacin       | 100986-85-4 | C <sub>18</sub> H <sub>20</sub> FN <sub>3</sub> O <sub>4</sub>                 | 361.14     | insoluble                        | -0.39              | 6.2             |
| Lincomycin         | 154-21-2    | C <sub>18</sub> H <sub>34</sub> N <sub>2</sub> O <sub>6</sub> S                | 406.21     | 927                              | 0.56               | 7.6             |
| Metronidazole      | 443-48-1    | C <sub>6</sub> H <sub>9</sub> N <sub>3</sub> O <sub>3</sub>                    | 171.06     | 9500                             | -0.02              | 2.6;15.4        |
| Moxifloxacin       | 354812-41-2 | C <sub>21</sub> H <sub>24</sub> FN <sub>3</sub> O <sub>4</sub>                 | 401.18     | 1146                             | 2.90               | 6.3; 9.3        |
| Norfloxacin        | 70458-96-7  | C <sub>16</sub> H <sub>18</sub> FN <sub>3</sub> O <sub>3</sub>                 | 319.13     | 1.78×10 <sup>5</sup>             | -1.03              | 5.8             |
| Roxithromycin      | 80214-83-1  | C <sub>41</sub> H <sub>76</sub> N <sub>2</sub> O <sub>15</sub>                 | 836.52     | 0.0189                           | 1.70               | 12.5 ;9.1       |
| Sulfadiazine       | 68-35-9     | C <sub>10</sub> H <sub>10</sub> N <sub>4</sub> O <sub>2</sub> S                | 250.05     | 77                               | -0.09              | 6.4             |
| Sulfamethoxazole   | 723-46-6    | C <sub>10</sub> H <sub>11</sub> N <sub>3</sub> O <sub>3</sub> S                | 253.28     | 610                              | 0.89               | 6.2; 2          |
| Trimethoprim       | 738-70-5    | C <sub>14</sub> H <sub>18</sub> N <sub>4</sub> O <sub>3</sub>                  | 290.14     | 400                              | 0.91               | 7.1             |
| <b>NSAIDs</b>      |             |                                                                                |            |                                  |                    |                 |
| Aceclofenac        | 89796-99-6  | C <sub>16</sub> H <sub>13</sub> Cl <sub>2</sub> NO <sub>4</sub>                | 354.18     | insoluble                        | 2.17               | 4.7             |
| Celecoxib          | 169590-42-5 | C <sub>17</sub> H <sub>14</sub> F <sub>3</sub> N <sub>3</sub> O <sub>2</sub> S | 381.37     | slightly soluble                 | 3.53               | 11.1            |
| Diclofenac         | 15307-86-5  | C <sub>14</sub> H <sub>11</sub> Cl <sub>2</sub> NO <sub>2</sub>                | 296.15     | 2.37                             | 4.51               | 4.2             |
| Etoricoxib         | 202409-33-4 | C <sub>18</sub> H <sub>15</sub> ClN <sub>2</sub> O <sub>2</sub> S              | 358.84     | 3.28                             | 0.88               | 4.5             |
| Indomethacin       | 53-86-1     | C <sub>19</sub> H <sub>16</sub> ClNO <sub>4</sub>                              | 357.79     | 0.937                            | 4.27               | 4.5             |
| Ketoprofen         | 22071-15-4  | C <sub>16</sub> H <sub>14</sub> O <sub>3</sub>                                 | 254.28     | 51                               | 3.12               | 4.5             |

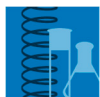

| PPCPs                        | CAS No      | Molecular formula                                                              | MW (g/mol) | Water solubility<br>(mg/L, 25°C) | logK <sub>ow</sub> | pK <sub>a</sub> |
|------------------------------|-------------|--------------------------------------------------------------------------------|------------|----------------------------------|--------------------|-----------------|
| Lornoxicam                   | 70374-39-9  | C <sub>13</sub> H <sub>10</sub> ClN <sub>3</sub> O <sub>4</sub> S <sub>2</sub> | 371.82     | 15.5                             | 2.62               | 4.7             |
| Naproxen                     | 22204-53-1  | C <sub>14</sub> H <sub>14</sub> O <sub>3</sub>                                 | 230.26     | 15.9                             | 3.18               | 4.2             |
| Nimesulide                   | 51803-78-2  | C <sub>13</sub> H <sub>12</sub> N <sub>2</sub> O <sub>5</sub> S                | 308.31     | 26.9                             | 2.60               | 6.5             |
| Piroxicam                    | 36322-90-4  | C <sub>15</sub> H <sub>13</sub> N <sub>3</sub> O <sub>4</sub> S                | 331.35     | 23                               | 3.06               | 6.3             |
| Tolfenamic acid              | 13710-19-5  | C <sub>14</sub> H <sub>12</sub> ClNO <sub>2</sub>                              | 261.70     | 1000                             | 5.17               | 5.1             |
| <b>Anxiolytics-Sedatives</b> |             |                                                                                |            |                                  |                    |                 |
| Alprazolam                   | 28981-97-7  | C <sub>17</sub> H <sub>13</sub> ClN <sub>4</sub>                               | 308.76     | 40                               | 2.12               |                 |
| Bromazepam                   | 1812-30-2   | C <sub>14</sub> H <sub>10</sub> BrN <sub>3</sub> O                             | 316.15     | 175                              | 2.05               | 2.7             |
| Buspirone                    | 36505-84-7  | C <sub>21</sub> H <sub>31</sub> N <sub>5</sub> O <sub>2</sub>                  | 385.25     | 21.4                             | 2.63               | 7.6             |
| Clobazam                     | 22316-47-8  | C <sub>16</sub> H <sub>13</sub> ClN <sub>2</sub> O <sub>2</sub>                | 300.74     | 266.9                            | 1.69               | 6.7             |
| Diazepam                     | 439-14-5    | C <sub>16</sub> H <sub>13</sub> ClN <sub>2</sub> O                             | 284.74     | 50                               | 2.82               | 3.4             |
| Flunitrazepam                | 1622-62-4   | C <sub>16</sub> H <sub>12</sub> FN <sub>3</sub> O <sub>3</sub>                 | 313.28     | 8.58                             | 2.06               | 1.8             |
| Lorazepam                    | 846-49-1    | C <sub>15</sub> H <sub>10</sub> Cl <sub>2</sub> O <sub>2</sub> N <sub>2</sub>  | 321.16     | 80                               | 2.39               | 13              |
| Midazolam                    | 59467-70-8  | C <sub>18</sub> H <sub>13</sub> ClFN <sub>3</sub>                              | 325.77     | 24                               | 4.33               | 5.5             |
| Oxazepam                     | 604-75-1    | C <sub>15</sub> H <sub>11</sub> ClN <sub>2</sub> O <sub>2</sub>                | 286.71     | 179                              | 2.24               | 10.6; -1.5      |
| Triazolam                    | 28911-01-5  | C <sub>17</sub> H <sub>12</sub> Cl <sub>2</sub> N <sub>4</sub>                 | 343.21     | 4.53                             | 2.42               | 4.3             |
| <b>Antidepressants</b>       |             |                                                                                |            |                                  |                    |                 |
| Amitriptyline                | 549-18-8    | C <sub>20</sub> H <sub>23</sub> N*HCl                                          | 313.86     | 9.71                             | 4.92               | 9.8             |
| Bupropion                    | 34911-55-2  | C <sub>13</sub> H <sub>18</sub> ClNO                                           | 239.11     | 140                              | 3.85               | 8.2             |
| Citalopram                   | 59729-33-8  | C <sub>20</sub> H <sub>21</sub> FN <sub>2</sub> O                              | 324.16     | 5.9                              | 3.50               | 9.8             |
| Doxepin                      | 1668-19-5   | C <sub>19</sub> H <sub>21</sub> NO                                             | 279.16     | 31.6                             | 4.29               | 9.8             |
| Duloxetine                   | 116539-59-4 | C <sub>18</sub> H <sub>19</sub> NOS                                            | 297.12     | 13                               | 4.68               | 9.7             |
| Fluvoxamine                  | 54739-18-3  | C <sub>15</sub> H <sub>21</sub> F <sub>3</sub> N <sub>2</sub> O <sub>2</sub>   | 318.16     | 7.34                             | 3.20               | 9.2             |
| Sertraline                   | 79617-96-2  | C <sub>17</sub> H <sub>17</sub> Cl <sub>2</sub> N                              | 305.07     | 3.5                              | 5.29               | 9.9             |
| Venlafaxine                  | 93413-69-5  | C <sub>17</sub> H <sub>27</sub> NO <sub>2</sub>                                | 277.20     | 267                              | 3.28               | 8.9             |



| PPCPs                    | CAS No      | Molecular formula                                                              | MW (g/mol) | Water solubility<br>(mg/L, 25°C) | logK <sub>ow</sub> | pK <sub>a</sub> |
|--------------------------|-------------|--------------------------------------------------------------------------------|------------|----------------------------------|--------------------|-----------------|
| <b>Antineoplastics</b>   |             |                                                                                |            |                                  |                    |                 |
| Capecitabine             | 154361-50-9 | C <sub>15</sub> H <sub>22</sub> FN <sub>3</sub> O <sub>6</sub>                 | 359.35     | 26000                            | 0.40               | 1.9             |
| Cyclophosphamide         | 50-18-0     | C <sub>7</sub> H <sub>15</sub> Cl <sub>2</sub> N <sub>2</sub> O <sub>2</sub> P | 260.02     | 40000                            | 0.63               | 2.8             |
| Cytarabine               | 147-94-4    | C <sub>9</sub> H <sub>13</sub> N <sub>3</sub> O <sub>5</sub>                   | 243.09     | 1000000                          | -2.8               | 4.2             |
| Dacarbazine              | 04/03/4342  | C <sub>6</sub> H <sub>10</sub> N <sub>6</sub> O                                | 182.18     | 4220                             | -0.24              | 4.4             |
| Doxorubicin              | 23214-92-8  | C <sub>27</sub> H <sub>29</sub> NO <sub>11</sub>                               | 543.17     | 2600                             | 1.27               | 7.3;8.5;9.5     |
| Methotrexate             | 59-05-2     | C <sub>20</sub> H <sub>22</sub> N <sub>8</sub> O <sub>5</sub>                  | 454.17     | 2600                             | -1.85              | 4.7             |
| Tamoxifen citrate        | 10540-29-1  | C <sub>26</sub> H <sub>29</sub> NO                                             | 371.52     | 1.02                             | 6.3                | 8.7             |
| Viblastine               | 865-21-4    | C <sub>46</sub> H <sub>58</sub> N <sub>4</sub> O <sub>9</sub>                  | 810.42     | 4,46×10 <sup>-2</sup>            | 3.7                | 5.4;7.4         |
| <b>Beta-blockers</b>     |             |                                                                                |            |                                  |                    |                 |
| Atenolol                 | 29122-68-7  | C <sub>14</sub> H <sub>22</sub> N <sub>2</sub> O <sub>3</sub>                  | 266.16     | 13300                            | 0.16               | 9.6             |
| Bisoprolol               | 66722-44-9  | C <sub>18</sub> H <sub>31</sub> NO <sub>4</sub>                                | 325.23     | 2240                             | 1.87               | 9.3; 14.1       |
| Carvedilol               | 72956-09-3  | C <sub>24</sub> H <sub>26</sub> N <sub>2</sub> O <sub>4</sub>                  | 406.47     | 0.583                            | 4.19               | 7.8             |
| Metoprolol               | 51384-51-1  | C <sub>15</sub> H <sub>25</sub> NO <sub>3</sub>                                | 267.18     | 16900                            | 1.88               | 14.1            |
| Pindolol                 | 13523-86-9  | C <sub>14</sub> H <sub>20</sub> N <sub>2</sub> O <sub>2</sub>                  | 248.15     | 7880                             | 1.75               | 9.3             |
| Propranolol              | 525-66-6    | C <sub>16</sub> H <sub>21</sub> NO <sub>2</sub>                                | 259.16     | 61.7                             | 3.48               | 9.4             |
| Timolol                  | 26839-75-8  | C <sub>13</sub> H <sub>24</sub> N <sub>4</sub> O <sub>3</sub> S                | 316.16     | 2740                             | 1.83               | 9.2             |
| <b>Antihypertensives</b> |             |                                                                                |            |                                  |                    |                 |
| Enalapril                | 75847-73-3  | C <sub>20</sub> H <sub>28</sub> N <sub>2</sub> O <sub>5</sub>                  | 376.2      | 16400                            | 2.00               | 3; 5.4          |
| Irbesartan               | 138402-11-6 | C <sub>25</sub> H <sub>28</sub> N <sub>6</sub> O                               | 428.23     | 0.059                            | 6.00               | 4.1; 4.3        |
| Losartan                 | 114798-26-4 | C <sub>22</sub> H <sub>23</sub> ClN <sub>6</sub> O                             | 422.16     | 0.82                             | 6.10               | 5.5             |
| Ramipril                 | 87333-19-5  | C <sub>23</sub> H <sub>32</sub> N <sub>2</sub> O <sub>5</sub>                  | 416.23     | 3.5                              | 3.32               | 3.7; 5.2        |
| Telmisartan              | 144701-48-4 | C <sub>33</sub> H <sub>30</sub> N <sub>4</sub> O <sub>2</sub>                  | 514.62     | insoluble                        | 7.70               | 3.6; 6.1        |
| Valsartan                | 137862-53-4 | C <sub>24</sub> H <sub>29</sub> N <sub>5</sub> O <sub>3</sub>                  | 435.23     | 1406                             | 5.80               | 3.6             |
| <b>Antidiabetics</b>     |             |                                                                                |            |                                  |                    |                 |



| PPCPs                                  | CAS No      | Molecular formula                                                 | MW (g/mol) | Water solubility<br>(mg/L, 25°C) | logK <sub>ow</sub> | pK <sub>a</sub> |
|----------------------------------------|-------------|-------------------------------------------------------------------|------------|----------------------------------|--------------------|-----------------|
| Glibenclamide                          | 10238-21-8  | C <sub>23</sub> H <sub>28</sub> ClN <sub>3</sub> O <sub>5</sub> S | 494.00     | 4                                | 4.79               | 4.3; -1.2       |
| Gliclazide                             | 21187-98-4  | C <sub>15</sub> H <sub>21</sub> N <sub>3</sub> O <sub>3</sub> S   | 323.13     | 190                              | 2.12               | 5.8             |
| Glimepiride                            | 93479-97-1  | C <sub>24</sub> H <sub>34</sub> N <sub>4</sub> O <sub>5</sub> S   | 490.22     | insoluble                        | 3.50               | 5.0             |
| Glipizide                              | 29094-61-9  | C <sub>21</sub> H <sub>27</sub> N <sub>5</sub> O <sub>4</sub> S   | 445.18     | 37.2                             | 1.91               | 5.9             |
| Metformin                              | 657-24-9    | C <sub>4</sub> H <sub>11</sub> N <sub>5</sub>                     | 129.10     | 1.06×10 <sup>6</sup>             | -1.00              | 12.0            |
| Repaglinide                            | 135062-02-1 | C <sub>27</sub> H <sub>36</sub> N <sub>2</sub> O <sub>4</sub>     | 452.27     | 2.94                             | 5.90               | 3.7             |
| <b>Urinary tract pharmaceuticals</b>   |             |                                                                   |            |                                  |                    |                 |
| Alfuzosin                              | 81403-80-7  | C <sub>19</sub> H <sub>27</sub> N <sub>5</sub> O <sub>4</sub>     | 389.21     | 92                               | 1.40               | 8.1             |
| Finasteride                            | 98319-26-7  | C <sub>23</sub> H <sub>36</sub> N <sub>2</sub> O <sub>2</sub>     | 372.28     | 11,7                             | 3.03               | 4.9; 6.2        |
| Progesterone                           | 57-83-0     | C <sub>21</sub> H <sub>30</sub> O <sub>2</sub>                    | 314.22     | 8.81                             | 3.87               | 18.9; -4.8      |
| Raloxifene                             | 84449-90-1  | C <sub>28</sub> H <sub>27</sub> NO <sub>4</sub> S                 | 473.17     | 0.25                             | 6.09               | 8; 8.9; 9.9     |
| Sildenafil                             | 139755-83-2 | C <sub>22</sub> H <sub>30</sub> N <sub>6</sub> O <sub>4</sub> S   | 474.20     | 3500                             | 2.75               | 6.0             |
| <b>Analgesics and muscle relaxants</b> |             |                                                                   |            |                                  |                    |                 |
| Acetaminophen                          | 103-90-2    | C <sub>8</sub> H <sub>9</sub> NO <sub>2</sub>                     | 151.16     | 1.40×10 <sup>4</sup>             | 0.46               | 9.4             |
| Orphenadrine                           | 4682-36-4   | C <sub>24</sub> H <sub>31</sub> NO <sub>8</sub>                   | 461.20     | 30                               | 3.77               | 8.9             |
| Thiocolchicoside                       | 602-41-5    | C <sub>27</sub> H <sub>33</sub> NO <sub>10</sub> S                | 563.62     | 10000                            | 0.34               | 12.7            |
| Tizanidine                             | 51322-75-9  | C <sub>9</sub> H <sub>8</sub> ClN <sub>5</sub> S                  | 253.71     | 133                              | 1.40               | 7.5             |
| Tramadol                               | 27203-92-5  | C <sub>16</sub> H <sub>25</sub> NO <sub>2</sub>                   | 263.38     | 1151                             | 3.00               | 9.4             |
| <b>Antipsychotic drugs</b>             |             |                                                                   |            |                                  |                    |                 |
| Amisulpride                            | 71675-85-9  | C <sub>17</sub> H <sub>27</sub> N <sub>3</sub> O <sub>4</sub> S   | 369.48     | 293                              | 1.06               | 9.0             |
| Olanzapine                             | 132539-06-1 | C <sub>17</sub> H <sub>20</sub> N <sub>4</sub> S                  | 312.43     | 39.88                            | 3.00               | 4.0; 7.2; 14.2  |
| Quetiapine                             | 111974-72-2 | C <sub>21</sub> H <sub>25</sub> N <sub>3</sub> O <sub>2</sub> S   | 383.51     | 0.5869                           | 2.80               | 7.1             |
| Risperidone                            | 106266-06-2 | C <sub>23</sub> H <sub>27</sub> FN <sub>4</sub> O <sub>2</sub>    | 410.48     | 2330                             | 3.49               | 8.8             |
| <b>Anticonvulsants</b>                 |             |                                                                   |            |                                  |                    |                 |
| Carbamazepine                          | 298-46-4    | C <sub>15</sub> H <sub>12</sub> N <sub>2</sub> O                  | 236.09     | 17.7                             | 2.45               | 3.8             |





| PPCPs                             | CAS No      | Molecular formula                                                              | MW (g/mol) | Water solubility<br>(mg/L, 25°C) | logK <sub>ow</sub> | pK <sub>a</sub> |
|-----------------------------------|-------------|--------------------------------------------------------------------------------|------------|----------------------------------|--------------------|-----------------|
| Gabapentin                        | 60142-96-3  | C <sub>9</sub> H <sub>17</sub> NO <sub>2</sub>                                 | 171.24     | 4490                             | 1.10               | 3.7             |
| Lamotrigine                       | 84057-84-1  | C <sub>9</sub> H <sub>7</sub> Cl <sub>2</sub> N <sub>5</sub>                   | 256.09     | 170                              | 2.50               | 8.5; 9.2        |
| Pregabalin                        | 148553-50-8 | C <sub>8</sub> H <sub>17</sub> NO <sub>2</sub>                                 | 159.23     | 12000                            | -1.35              | 4.2; 10.6       |
| <b>Lipid regulators</b>           |             |                                                                                |            |                                  |                    |                 |
| Atorvastatin                      | 134523-00-5 | C <sub>33</sub> H <sub>35</sub> FN <sub>2</sub> O <sub>5</sub>                 | 558.25     | 1.12×10 <sup>-3</sup>            | 6.00               | 4.3 ; 14.9      |
| Bezafibrate                       | 41859-67-0  | C <sub>19</sub> H <sub>20</sub> ClNO <sub>4</sub>                              | 361.11     | 1.55                             | 4.00               | 3.8; -0.8       |
| Clofibric acid (TP of clofibrate) | 882-09-7    | C <sub>10</sub> H <sub>11</sub> ClO <sub>3</sub>                               | 214.65     | 583                              | 2.57               | 3.2             |
| Rosuvastatin                      | 287714-41-4 | C <sub>22</sub> H <sub>28</sub> FN <sub>3</sub> O <sub>6</sub> S               | 481.17     | 17.96                            | 0.13               | 4.0             |
| <b>Antihistamines</b>             |             |                                                                                |            |                                  |                    |                 |
| Cetirizine dihydrochloride        | 83881-51-0  | C <sub>21</sub> H <sub>25</sub> ClN <sub>2</sub> O <sub>3</sub>                | 388.16     | 101                              | 2.80               | 2.7; 3.6; 7.6   |
| Desloratadine (TP of loratadine)  | 100643-71-8 | C <sub>19</sub> H <sub>19</sub> ClN <sub>2</sub>                               | 310.12     | 3.95                             | 3.20               | 9.7             |
| Ebastine                          | 90729-43-4  | C <sub>32</sub> H <sub>39</sub> NO <sub>2</sub>                                | 469.30     | 2                                | 7.20               | 8.2             |
| Methdilazine                      | 1982-37-2   | C <sub>18</sub> H <sub>20</sub> N <sub>2</sub> S                               | 296.13     | 0.348                            | 5.23               | 7.5             |
| <b>Proton pump inhibitors</b>     |             |                                                                                |            |                                  |                    |                 |
| Lansoprazole                      | 103577-45-3 | C <sub>16</sub> H <sub>14</sub> F <sub>3</sub> N <sub>3</sub> O <sub>2</sub> S | 369.08     | 0.97                             | 1.90               | 1.1; 6.9; 12    |
| Omeprazole                        | 73590-58-6  | C <sub>17</sub> H <sub>19</sub> N <sub>3</sub> O <sub>3</sub> S                | 345.11     | 359                              | 2.23               | 1.2; 7.4        |
| Pantoprazole                      | 102625-70-7 | C <sub>16</sub> H <sub>15</sub> F <sub>2</sub> N <sub>3</sub> O <sub>4</sub> S | 383.08     | 48                               | 0.50               | 3.9; 8.2        |
| <b>Antidiarrheals</b>             |             |                                                                                |            |                                  |                    |                 |
| Loperamide                        | 53179-11-6  | C <sub>29</sub> H <sub>33</sub> ClN <sub>2</sub> O <sub>2</sub>                | 476.22     | 405                              | 5.15               | 9.4; 14         |
| Rifaximin                         | 80621-81-4  | C <sub>43</sub> H <sub>51</sub> N <sub>3</sub> O <sub>11</sub>                 | 785.35     | 7.38                             | 2.60               | 11.9            |
| <b>Antivirals</b>                 |             |                                                                                |            |                                  |                    |                 |
| Abacavir sulphate                 | 188062-50-2 | C <sub>14</sub> H <sub>18</sub> N <sub>6</sub> O                               | 286.33     | 77000                            | 1.20               | 5.8; 15.4       |
| Adefovir                          | 106941-25-7 | C <sub>8</sub> H <sub>12</sub> N <sub>5</sub> O <sub>4</sub> P                 | 273.06     | 7.64×10 <sup>4</sup>             | -2.28              | 2.0; 6.8        |
| <b>Diuretics</b>                  |             |                                                                                |            |                                  |                    |                 |
| Furosemide                        | 54-31-9     | C <sub>12</sub> H <sub>11</sub> ClN <sub>2</sub> O <sub>5</sub> S              | 330.74     | 73.1                             | 2.03               | 3.9             |
| Indapamide                        | 26807-65-8  | C <sub>16</sub> H <sub>16</sub> ClN <sub>3</sub> O <sub>3</sub> S              | 365.06     | 75                               | 2.00               | 8.8             |

| PPCPs                           | CAS No      | Molecular formula                                                | MW (g/mol) | Water solubility<br>(mg/L, 25°C) | logK <sub>ow</sub> | pK <sub>a</sub> |
|---------------------------------|-------------|------------------------------------------------------------------|------------|----------------------------------|--------------------|-----------------|
| <b>Cardiovascular agents</b>    |             |                                                                  |            |                                  |                    |                 |
| Dopamine                        | 62-31-7     | C <sub>8</sub> H <sub>12</sub> ClNO <sub>2</sub>                 | 189.06     | 1×10 <sup>6</sup>                | -0.98              | 8.93            |
| Trimetazidine                   | 5011-34-7   | C <sub>14</sub> H <sub>22</sub> N <sub>2</sub> O <sub>3</sub>    | 266.16     | 754                              | 1.04               | 4.5; 9.1        |
| <b>Antifungals</b>              |             |                                                                  |            |                                  |                    |                 |
| Fluconazole                     | 86386-73-4  | C <sub>13</sub> H <sub>12</sub> F <sub>2</sub> N <sub>6</sub> O  | 306.10     | 1                                | 0.40               | 2.3             |
| Voriconazole                    | 137234-62-9 | C <sub>16</sub> H <sub>14</sub> F <sub>3</sub> N <sub>5</sub> O  | 349.12     | 610                              | 1.00               | 1.8             |
| <b>Anti-vertigo</b>             |             |                                                                  |            |                                  |                    |                 |
| Betahistine                     | 5638-76-6   | C <sub>8</sub> H <sub>12</sub> N <sub>2</sub>                    | 136.10     | 1×10 <sup>6</sup>                | 0.68               | 10.1            |
| Cinnarizine                     | 298-57-7    | C <sub>26</sub> H <sub>28</sub> N <sub>2</sub>                   | 368.23     | 750                              | 5.77               | 2 ; 7.5         |
| <b>Corticosteroids</b>          |             |                                                                  |            |                                  |                    |                 |
| Prednisolone                    | 50-24-8     | C <sub>21</sub> H <sub>28</sub> O <sub>5</sub>                   | 360.44     | 223                              | 1.62               | 12.6; -2.9      |
| Fluticasone propionate          | 80474-14-2  | C <sub>25</sub> H <sub>31</sub> F <sub>3</sub> O <sub>5</sub> S  | 500.57     | 0.51                             | 3.40               | 13.6            |
| <b>Antiulcer agents</b>         |             |                                                                  |            |                                  |                    |                 |
| Cimetidine                      | 51481-61-9  | C <sub>10</sub> H <sub>16</sub> N <sub>6</sub> S                 | 252.12     | 9380                             | 0.40               | 6.8             |
| Ranitidine                      | 66357-35-5  | C <sub>13</sub> H <sub>22</sub> N <sub>4</sub> O <sub>3</sub> S  | 314.14     | 24700                            | 0.27               | 8.2 ;2.7        |
| <b>Anesthetics</b>              |             |                                                                  |            |                                  |                    |                 |
| Lidocaine                       | 137-58-6    | C <sub>14</sub> H <sub>22</sub> N <sub>2</sub> O                 | 234.34     | 4100                             | 2.44               | 7.9             |
| Prilocaine                      | 721-50-6    | C <sub>13</sub> H <sub>20</sub> N <sub>2</sub> O                 | 220.16     | 541                              | 2.11               | 7.9             |
| <b>Calcium channel blockers</b> |             |                                                                  |            |                                  |                    |                 |
| Diltiazem                       | 42399-41-7  | C <sub>22</sub> H <sub>26</sub> N <sub>2</sub> O <sub>4</sub> S  | 414.16     | 465                              | 2.80               | 8.1             |
| Nifedipine                      | 21829-25-4  | C <sub>17</sub> H <sub>18</sub> N <sub>2</sub> O <sub>6</sub>    | 346.12     | 1.7×10 <sup>-5</sup>             | 2.20               | 3.9             |
| <b>Laxative</b>                 |             |                                                                  |            |                                  |                    |                 |
| Bisacodyl                       | 603-50-9    | C <sub>22</sub> H <sub>19</sub> NO <sub>4</sub>                  | 361.13     | 1.27                             | 3.00               | 4.7             |
| <b>Mucolytic agent</b>          |             |                                                                  |            |                                  |                    |                 |
| Bromhexine                      | 611-75-6    | C <sub>14</sub> H <sub>21</sub> Br <sub>2</sub> ClN <sub>2</sub> | 409.98     | 3.62                             | 4.30               | 9.3             |

| PPCPs                                            | CAS No      | Molecular formula                                              | MW (g/mol) | Water solubility<br>(mg/L, 25°C) | logK <sub>ow</sub> | pK <sub>a</sub>  |
|--------------------------------------------------|-------------|----------------------------------------------------------------|------------|----------------------------------|--------------------|------------------|
| <b>Anti-Parkinson</b>                            |             |                                                                |            |                                  |                    |                  |
| Pramipexole                                      | 104632-25-9 | C <sub>10</sub> H <sub>17</sub> N <sub>3</sub> S               | 211.33     | 3900                             | 0.40               | 4.7 ; 10.3; 17.7 |
| <b>β<sub>2</sub> adrenergic receptor agonist</b> |             |                                                                |            |                                  |                    |                  |
| Salbutamol                                       | 18559-94-9  | C <sub>13</sub> H <sub>21</sub> NO <sub>3</sub>                | 239.15     | 1.41×10 <sup>4</sup>             | 1.40               | 10.3             |
| <b>Antiplatelet agent</b>                        |             |                                                                |            |                                  |                    |                  |
| Clopidogrel                                      | 113665-84-2 | C <sub>16</sub> H <sub>16</sub> ClNO <sub>2</sub> S            | 321.06     | 50.78                            | 3.80               | 5.3              |
| <b>Thyroid hormone</b>                           |             |                                                                |            |                                  |                    |                  |
| Levothyroxine                                    | 51-48-9     | C <sub>15</sub> H <sub>11</sub> I <sub>4</sub> NO <sub>4</sub> | 776.69     | 1.05×10 <sup>-4</sup>            | 4.12               | 0.3; 7.4; 9.4    |
| <b>Stimulant</b>                                 |             |                                                                |            |                                  |                    |                  |
| Caffeine                                         | 58-08-2     | C <sub>8</sub> H <sub>10</sub> N <sub>4</sub> O <sub>2</sub>   | 194.08     | 2.16×10 <sup>4</sup>             | -0.07              | 10.4             |
| <b>Antiseptic/antibacterial</b>                  |             |                                                                |            |                                  |                    |                  |
| Triclosan                                        | 3380-34-5   | C <sub>12</sub> H <sub>7</sub> Cl <sub>3</sub> O <sub>2</sub>  | 287.95     | 10                               | 4.76               | 7.9              |
| <b>Boosting supplement</b>                       |             |                                                                |            |                                  |                    |                  |
| Caffeic acid                                     | 331-39-5    | C <sub>9</sub> H <sub>8</sub> O <sub>4</sub>                   | 180.04     | 5.41×10 <sup>4</sup>             | 1.15               | 4.62             |
| <b>Insect repellent</b>                          |             |                                                                |            |                                  |                    |                  |
| DEET                                             | 134-62-3    | C <sub>12</sub> H <sub>17</sub> NO                             | 191.13     | 912                              | 2.02               | -1.4             |
| <b>UVA/UVB filters</b>                           |             |                                                                |            |                                  |                    |                  |
| BP-1                                             | 119-61-9    | C <sub>13</sub> H <sub>10</sub> O <sub>3</sub>                 | 182.22     | 137                              | 3.18               | n.a.             |
| BP-2                                             | 131-55-5    | C <sub>13</sub> H <sub>10</sub> O <sub>5</sub>                 | 246.22     | 8821                             | 2.78               | 7.1; 7.9         |
| BP-3                                             | 131-57-7    | C <sub>14</sub> H <sub>12</sub> O <sub>3</sub>                 | 228.08     | 3.7                              | 3.79               | 7.1              |
| PABA                                             | 150-13-0    | C <sub>7</sub> H <sub>7</sub> NO <sub>2</sub>                  | 137.05     | 6110                             | 0.83               | 2.4              |

**Table S5** Instrumental Parameters in LC–Orbitrap MS/MS

| Time (min) | Flow (mL min <sup>-1</sup> ) | MeOH + 0.1% FA | H <sub>2</sub> O + 0.1% FA |
|------------|------------------------------|----------------|----------------------------|
| 0.0        | 0.200                        | 10.0           | 90.0                       |
| 1.5        | 0.200                        | 10.0           | 90.0                       |
| 4.0        | 0.200                        | 60.0           | 40.0                       |
| 8.0        | 0.200                        | 70.0           | 30.0                       |
| 11.0       | 0.200                        | 100.0          | 0.0                        |
| 13.0       | 0.200                        | 100.0          | 0.0                        |
| 14.0       | 0.350                        | 10.0           | 90.0                       |
| 15.0       | 0.350                        | 10.0           | 90.0                       |

  

| HESI Parameters         | Value |
|-------------------------|-------|
| Tube lens (V)           | 110   |
| Sheath gas flow rate    | 45    |
| Auxiliary gas flow rate | 10    |
| Sweep gas flow rate     | 2     |
| Spray voltage (kV)      | 2.5   |
| Cap. Temperature (°C)   | 320   |
| S-lens RF               | 50    |
| Heater temperature (°C) | 400   |

  

| MS Parameters | Value           |
|---------------|-----------------|
| Polarity      | Negative        |
| Resolution    | 70,000          |
| Scan Range    | 100–1000 m/z    |
| AGC Target    | 10 <sup>6</sup> |
| Maximum IT    | auto            |
| Microscan     | 1               |

  

| MS/MS Parameters | Value             |
|------------------|-------------------|
| Resolution       | 17,500            |
| Isolation window | 1 m/z             |
| CE/(N)CE         | 15-30-50          |
| AGC target       | 2*10 <sup>5</sup> |
| Maximum IT       | auto              |
| Apex trigger     | 2-5 s             |

  

| LC Parameters           | Value |
|-------------------------|-------|
| Injection volume (μL)   | 5     |
| Column temperature (°C) | 40    |

**Table S6** LC-Orbitrap MS/MS data for the target PhACs

| PhACs            | Formula                                                                        | RT    | ESI | Adduct Ion                            | m/z (theor)     | m/z (exp.) | $\Delta$ (ppm) | Fragments |          |          |          |
|------------------|--------------------------------------------------------------------------------|-------|-----|---------------------------------------|-----------------|------------|----------------|-----------|----------|----------|----------|
| Amoxicillin      | C <sub>16</sub> H <sub>19</sub> N <sub>3</sub> O <sub>5</sub> S                | 5.07  | +   | M+H                                   | <b>366.1118</b> | 398.1379   | -0.2512        | 321.0900  | 211.0711 | 208.0415 | 160.0425 |
|                  | C <sub>16</sub> H <sub>19</sub> N <sub>3</sub> O <sub>4</sub> S                |       |     | M+CH <sub>3</sub> OH <sub>2</sub> O+H | 398.138         |            |                |           |          |          |          |
| Ampicillin       | C <sub>38</sub> H <sub>72</sub> N <sub>2</sub> O <sub>12</sub>                 | 6.11  | +   | M+H                                   | <b>350.1169</b> | 350.1173   | 1.0826         | 106.0655  | 192.0475 | 160.0429 | 174.0548 |
|                  | C <sub>17</sub> H <sub>18</sub> FN <sub>3</sub> O <sub>3</sub>                 |       |     | M+CH <sub>3</sub> OH <sub>2</sub> O+H | 382.1431        |            |                |           |          |          |          |
| Azithromycin     | C <sub>38</sub> H <sub>69</sub> NO <sub>13</sub>                               | 7.04  | +   | M+H                                   | <b>749.5158</b> | 749.5143   | -2.0250        | 591.4199  | 278.2111 |          |          |
| Ciprofloxacin    | C <sub>37</sub> H <sub>67</sub> NO <sub>13</sub>                               | 6.24  | +   | M+H                                   | <b>332.1405</b> | 332.1411   | 1.7546         | 231.0562  | 245.1082 | 288.1500 | 249.0663 |
| Clarithromycin   | C <sub>37</sub> H <sub>65</sub> NO <sub>12</sub>                               | 9.19  | +   | M+H                                   | <b>748.4842</b> | 748.4850   | 1.1308         | 158.1176  | 83.0498  | 590.3898 | 116.1074 |
| Erythromycin     | C <sub>6</sub> H <sub>7</sub> N <sub>3</sub> O                                 | 8.20  | +   | M-H <sub>2</sub> O+H                  | <b>716.4580</b> | 716.4570   | -0.2792        | 158.1176  | 83.0498  | 127.0754 | 116.0706 |
|                  | C <sub>18</sub> H <sub>20</sub> FN <sub>3</sub> O <sub>4</sub>                 |       |     | M+H                                   | 734.4685        |            |                |           |          |          |          |
| Isoniazid        | C <sub>18</sub> H <sub>34</sub> N <sub>2</sub> O <sub>6</sub> S                | 1.38  | +   | M+H                                   | <b>138.0662</b> | 138.0668   | 4.3292         | 57.0706   |          |          |          |
| Levofloxacin     | C <sub>6</sub> H <sub>9</sub> N <sub>3</sub> O <sub>3</sub>                    | 6.13  | +   | M+H                                   | <b>362.1511</b> | 362.1510   | -0.2734        | 731.6874  | 323.9638 | 633.7614 |          |
| Lincomycin       | C <sub>21</sub> H <sub>24</sub> FN <sub>3</sub> O <sub>4</sub>                 | 5.53  | +   | M+H                                   | <b>407.2210</b> | 407.2218   | 1.8952         | 266.1538  | 210.1276 |          |          |
| Metronidazole    | C <sub>16</sub> H <sub>18</sub> FN <sub>3</sub> O <sub>3</sub>                 | 3.10  | +   | M+H                                   | <b>172.0717</b> | 172.0720   | 1.9540         | 261.1034  | 382.1755 | 358.1924 | 305.0940 |
| Moxifloxacin     | C <sub>41</sub> H <sub>76</sub> N <sub>2</sub> O <sub>15</sub>                 | 6.78  | +   | M+H                                   | <b>402.1824</b> | 402.1831   | 1.7541         | 261.1035  | 382.1745 | 110.0968 | 82.0812  |
| Norfloxacin      | C <sub>10</sub> H <sub>10</sub> N <sub>4</sub> O <sub>2</sub> S                | 6.19  | +   | M+H                                   | <b>320.1405</b> | 320.1414   | 2.7736         | 233.1083  | 148.0555 | 219.0925 |          |
| Roxithromycin    | C <sub>10</sub> H <sub>11</sub> N <sub>3</sub> O <sub>5</sub> S                | 9.41  | +   | M+H                                   | <b>837.5319</b> | 837.5320   | 0.2310         | 158.1175  | 649.4368 | 83.0498  | 116.1072 |
| Sulfadiazine     | C <sub>14</sub> H <sub>18</sub> N <sub>4</sub> O <sub>3</sub>                  | 3.43  | +   | M+H                                   | <b>251.0597</b> | 251.0600   | 1.1055         | 108.0446  | 65.0392  | 156.0106 |          |
| Sulfamethoxazole | C <sub>16</sub> H <sub>13</sub> Cl <sub>2</sub> NO <sub>4</sub>                | 5.94  | +   | M+H                                   | <b>254.0594</b> | 254.0599   | 2.1512         | 108.0448  | 65.0393  | 92.0500  | 156.0117 |
| Trimethoprim     | C <sub>17</sub> H <sub>14</sub> F <sub>3</sub> N <sub>3</sub> O <sub>2</sub> S | 5.70  | +   | M+H                                   | <b>291.1452</b> | 291.1457   | 1.7892         | 123.0667  | 161.0822 | 245.1031 | 230.1160 |
| Aceclofenac      | C <sub>14</sub> H <sub>11</sub> Cl <sub>2</sub> NO <sub>2</sub>                | 10.20 | +   | M+H                                   | <b>354.0294</b> | 354.0299   | 1.4327         | 214.0416  | 215.0490 | 250.0182 |          |
| Celecoxib        | C <sub>18</sub> H <sub>15</sub> ClN <sub>2</sub> O <sub>2</sub> S              | 9.940 | -   | M-H                                   | <b>380.0686</b> | 380.0691   | 1.2137         | 68.9944   | 316.1071 | 276.0941 | 247.1109 |
| Diclofenac       | C <sub>19</sub> H <sub>16</sub> ClNO <sub>4</sub>                              | 10.43 | +   | M+H                                   | <b>296.0240</b> | 296.0245   | 1.8431         | 278.0131  | 250.0182 | 215.0494 |          |
| Etoricoxib       | C <sub>16</sub> H <sub>14</sub> O <sub>3</sub>                                 | 7.08  | +   | M+H                                   | <b>359.0616</b> | 359.0620   | 1.3709         | 312.0656  | 279.0681 | 243.0913 |          |
| Indomethacin     | C <sub>13</sub> H <sub>10</sub> ClN <sub>3</sub> O <sub>4</sub> S <sub>2</sub> | 10.45 | +   | M+H                                   | <b>358.0841</b> | 358.0849   | 2.3191         | 207.0914  | 195.1490 | 180.0805 | 84.0813  |
| Ketoprofen       | C <sub>14</sub> H <sub>14</sub> O <sub>3</sub>                                 | 8.39  | +   | M+H                                   | <b>255.1016</b> | 255.1020   | 1.7052         | 210.9820  | 108.9843 | 58.0408  | 166.0294 |
| Lornoxicam       | C <sub>13</sub> H <sub>12</sub> N <sub>2</sub> O <sub>5</sub> S                | 7.98  | +   | M+H                                   | <b>371.9874</b> | 371.9882   | 2.0409         | 207.0915  | 180.0805 | 152.0619 |          |
| Naproxen         | C <sub>15</sub> H <sub>13</sub> N <sub>3</sub> O <sub>4</sub> S                | 10.65 | -   | M-H                                   | <b>229.0870</b> | 229.0865   | -2.1276        | 254.1039  | 211.0861 | 195.0918 | 239.0806 |
| Nimesulide       | C <sub>14</sub> H <sub>12</sub> ClNO <sub>2</sub>                              | 8.19  | -   | M-H                                   | <b>307.0394</b> | 307.0402   | 2.6777         | 229.0618  | 214.9259 | 198.0553 | 241.5405 |

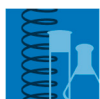

| PhACs            | Formula                                                                        | RT    | ESI | Adduct Ion | m/z (theor)     | m/z (exp.) | $\Delta$ (ppm) | Fragments |          |                   |
|------------------|--------------------------------------------------------------------------------|-------|-----|------------|-----------------|------------|----------------|-----------|----------|-------------------|
| Piroxicam        | C <sub>15</sub> H <sub>22</sub> FN <sub>3</sub> O <sub>6</sub>                 | 7.78  | +   | M+H        | <b>332.0700</b> | 332.0705   | 1.6430         | 95.0609   | 121.0399 | 91.0549           |
| Tolfenamic Acid  | C <sub>7</sub> H <sub>15</sub> Cl <sub>2</sub> N <sub>2</sub> O <sub>2</sub> P | 12.15 | -   | M-H        | <b>260.0483</b> | 260.0486   | 1.3268         | 244.0525  | 246.0493 | 209.1196 159.0611 |
| Capecitabine     | C <sub>9</sub> H <sub>13</sub> N <sub>3</sub> O <sub>5</sub>                   | 7.48  | +   | M+H        | <b>360.1565</b> | 360.1570   | 1.2547         | 130.0413  | 174.0311 | 244.1093          |
| Cyclophosphamide | C <sub>6</sub> H <sub>10</sub> N <sub>6</sub> O                                | 6.95  | +   | M+H        | <b>261.0321</b> | 261.0324   | 1.0694         | 140.0032  | 106.0418 | 233.0017          |
| Cytarabine       | C <sub>27</sub> H <sub>29</sub> NO <sub>11</sub>                               | 1.21  | +   | M+H        | <b>244.0928</b> | 244.0937   | 3.6419         | 112.0508  | 95.0245  |                   |
| Dacarbazine      | C <sub>20</sub> H <sub>22</sub> N <sub>8</sub> O <sub>5</sub>                  | 2.58  | +   | M+H        | <b>183.0989</b> | 183.0996   | 3.6243         | 65.0142   | 123.0428 | 90.9482           |
| Doxorubicin      | C <sub>26</sub> H <sub>29</sub> NO                                             | 8.13  | +   | M+H        | <b>544.1813</b> | 544.1822   | 1.5619         | 361.0693  | 86.0605  | 321.0749 130.0861 |
| Methotrexate     | C <sub>46</sub> H <sub>58</sub> N <sub>4</sub> O <sub>9</sub>                  | 6.01  | +   | M+H        | <b>455.1786</b> | 455.1808   | 4.7577         | 94.0656   | 106.0655 | 170.0366          |
| Tamoxifen        | C <sub>17</sub> H <sub>13</sub> ClN <sub>4</sub>                               | 11.68 | +   | M+H        | <b>372.2322</b> | 372.2328   | 1.4979         | 321.6286  | 72.0815  |                   |
| Viblastine       | C <sub>14</sub> H <sub>10</sub> BrN <sub>3</sub> O                             | 7.11  | +   | M+H        | <b>811.4277</b> | 811.4280   | 0.3432         | 224.1274  | 751.4069 | 355.2013 542.3049 |
| Alprazolam       | C <sub>21</sub> H <sub>31</sub> N <sub>5</sub> O <sub>2</sub>                  | 8.42  | +   | M+H        | <b>309.0902</b> | 309.0902   | 0.0000         | 281.0703  | 205.0705 | 274.1207          |
| Bromazepam       | C <sub>16</sub> H <sub>13</sub> ClN <sub>2</sub> O <sub>2</sub>                | 7.42  | +   | M+H        | <b>316.0080</b> | 316.0085   | 1.7244         | 182.0839  | 209.0946 | 261.0022 288.0131 |
| Buspirone        | C <sub>16</sub> H <sub>13</sub> ClN <sub>2</sub> O                             | 6.79  | +   | M+H        | <b>386.2551</b> | 386.2555   | 1.2263         | 122.0714  | 148.0870 | 222.1489 265.1910 |
| Clobazam         | C <sub>16</sub> H <sub>12</sub> FN <sub>3</sub> O <sub>3</sub>                 | 9.46  | +   | M+H        | <b>301.0738</b> | 301.0738   | 0.0000         | 185.0961  | 141.0698 | 170.0725 71.9526  |
| Diazepam         | C <sub>15</sub> H <sub>10</sub> Cl <sub>2</sub> O <sub>2</sub> N <sub>2</sub>  | 9.12  | +   | M+H        | <b>285.0789</b> | 285.0793   | 1.4933         | 154.0417  | 257.0838 | 193.0886 222.1150 |
| Flunitrazepam    | C <sub>18</sub> H <sub>13</sub> ClFN <sub>3</sub>                              | 7.80  | +   | M+H        | <b>314.0936</b> | 314.0935   | 0.3184         | 300.0894  | 183.0600 |                   |
| Lorazepam        | C <sub>15</sub> H <sub>11</sub> ClN <sub>2</sub> O <sub>2</sub>                | 8.06  | +   | M+H        | <b>321.0192</b> | 321.0191   | 0.3115         | 275.0128  | 292.9292 | 229.0521          |
| Midazolam        | C <sub>17</sub> H <sub>12</sub> Cl <sub>2</sub> N <sub>4</sub>                 | 7.46  | +   | M+H        | <b>326.0855</b> | 326.0854   | 0.3067         | 291.1162  | 222.0713 | 183.0606 109.0452 |
| Oxazepam         | C <sub>20</sub> H <sub>28</sub> N <sub>2</sub> O <sub>5</sub>                  | 8.08  | +   | M+H        | <b>287.0581</b> | 287.0582   | -0.3484        | 241.0524  | 104.0499 | 231.0681 118.0527 |
| Triazolam        | C <sub>25</sub> H <sub>28</sub> N <sub>6</sub> O                               | 8.60  | +   | M+H        | <b>343.0512</b> | 343.0509   | 0.8745         | 308.0820  | 315.0319 | 239.0368          |
| Enalapril        | C <sub>22</sub> H <sub>23</sub> ClN <sub>6</sub> O                             | 7.18  | +   | M+H        | <b>377.2071</b> | 377.2078   | 1.7594         | 91.0548   | 234.1487 | 117.0701 160.1120 |
| Irbesartan       | C <sub>23</sub> H <sub>32</sub> N <sub>2</sub> O <sub>5</sub>                  | 8.44  | +   | M+H        | <b>429.2397</b> | 429.2404   | 1.7426         | 111.0318  | 121.0398 | 93.0452           |
| Losartan         | C <sub>33</sub> H <sub>30</sub> N <sub>4</sub> O <sub>2</sub>                  | 8.11  | +   | M+H        | <b>423.1695</b> | 423.1701   | 1.5018         | 207.0922  | 180.0813 | 171.0689 405.1605 |
| Ramipril         | C <sub>24</sub> H <sub>29</sub> N <sub>5</sub> O <sub>3</sub>                  | 8.15  | +   | M+H        | <b>417.2384</b> | 417.2391   | 1.6171         | 234.1487  | 117.0701 | 130.0864 160.1119 |
| Telmisartan      | C <sub>20</sub> H <sub>23</sub> N*HCl                                          | 8.97  | +   | M+H        | <b>515.2442</b> | 515.2453   | 2.1355         | 185.0956  | 276.1360 | 170.0721 261.1125 |
| Valsartan        | C <sub>13</sub> H <sub>18</sub> ClNO                                           | 9.07  | +   | M+H        | <b>436.2343</b> | 436.2358   | 3.3441         | 207.0916  | 180.0807 | 235.0991 291.1488 |
| Amitriptyline    | C <sub>20</sub> H <sub>21</sub> FN <sub>2</sub> O                              | 8.41  | +   | M+H        | <b>278.1903</b> | 278.1908   | 1.7844         | 91.0548   | 105.0703 | 117.0701 191.0852 |
| Bupropion        | C <sub>19</sub> H <sub>21</sub> NO                                             | 6.83  | +   | M+H        | <b>240.1150</b> | 240.1154   | 1.9272         | 131.0730  | 166.0419 | 139.0309 184.0525 |
| Citalopram       | C <sub>18</sub> H <sub>19</sub> NOS                                            | 7.21  | +   | M+H        | <b>325.1711</b> | 325.1716   | 1.5371         | 109.0452  | 262.1019 | 116.0498          |
| Doxepin          | C <sub>15</sub> H <sub>21</sub> F <sub>3</sub> N <sub>2</sub> O <sub>2</sub>   | 7.44  | +   | M+H        | <b>280.1696</b> | 280.1702   | 2.0560         | 107.0495  | 141.0697 | 117.0700 84.0813  |





| PhACs              | Formula                                                           | RT    | ESI | Adduct Ion | m/z (theor)     | m/z (exp.) | $\Delta$ (ppm) | Fragments |           |          |          |
|--------------------|-------------------------------------------------------------------|-------|-----|------------|-----------------|------------|----------------|-----------|-----------|----------|----------|
| Duloxetine         | C <sub>17</sub> H <sub>17</sub> Cl <sub>2</sub> N                 | 8.20  | +   | M+H        | <b>298.1260</b> | 298.1266   | 1.8328         | 144.1382  | 100.1125  |          |          |
| Fluvoxamine        | C <sub>17</sub> H <sub>27</sub> NO <sub>2</sub>                   | 8.49  | +   | M+H        | <b>319.1628</b> | 319.1633   | 1.6922         | 71.0499   | 200.0680  | 228.0988 | 87.0808  |
| Sertraline         | C <sub>14</sub> H <sub>22</sub> N <sub>2</sub> O <sub>3</sub>     | 9.07  | +   | M+H        | <b>306.0811</b> | 306.0817   | 2.1108         | 275.0383  | 196.9916  | 158.9761 | 129.0698 |
| Venlafaxine        | C <sub>18</sub> H <sub>31</sub> NO <sub>4</sub>                   | 7.04  | +   | M+H        | <b>278.2115</b> | 278.2119   | 1.5224         | 58.0659   | 121.0650  | 121.0650 | 147.0806 |
| Atenolol           | C <sub>24</sub> H <sub>26</sub> N <sub>2</sub> O <sub>4</sub>     | 3.57  | +   | M+H        | 267.1703        | 267.1707   | 1.4797         | 225.1229  | 190.0860  | 116.1071 | 98.0967  |
| Bisoprolol         | C <sub>15</sub> H <sub>25</sub> NO <sub>3</sub>                   | 6.97  | +   | M+H        | <b>326.2326</b> | 326.2331   | 1.6668         | 116.1073  | 74.0608   | 98.0966  |          |
| Carvedilol         | C <sub>14</sub> H <sub>20</sub> N <sub>2</sub> O <sub>2</sub>     | 7.51  | +   | M+H        | <b>407.1965</b> | 407.1971   | 1.5068         | 100.0762  | 222.0914  | 283.1440 | 194.0966 |
| Metoprolol         | C <sub>16</sub> H <sub>21</sub> NO <sub>2</sub>                   | 6.38  | +   | M+H        | <b>268.1907</b> | 268.1910   | 1.1933         | 62.9469   | 115.9702  | 128.0458 |          |
| Pindolol           | C <sub>13</sub> H <sub>24</sub> N <sub>4</sub> O <sub>3</sub> S   | 5.53  | +   | M+H        | <b>249.1598</b> | 249.1602   | 1.8142         | 67.0550   |           |          |          |
| Propranolol        | C <sub>23</sub> H <sub>28</sub> ClN <sub>3</sub> O <sub>5</sub> S | 7.21  | +   | M+H        | <b>260.1645</b> | 260.1650   | 2.0720         | 116.1074  | 155.0856  | 183.0806 | 56.0503  |
| Timolol            | C <sub>15</sub> H <sub>21</sub> N <sub>3</sub> O <sub>3</sub> S   | 6.33  | +   | M+H        | <b>317.1642</b> | 317.1647   | 1.7148         | 244.0749  | 188.0489  | 74.0608  | 56.0503  |
| Glibenclamide      | C <sub>24</sub> H <sub>34</sub> N <sub>4</sub> O <sub>5</sub> S   | 9.91  | +   | M+H        | <b>494.1511</b> | 494.1519   | 1.5906         | 304.0730  |           |          |          |
| Gliclazide         | C <sub>21</sub> H <sub>27</sub> N <sub>5</sub> O <sub>4</sub> S   | 8.35  | +   | M+H        | <b>324.1376</b> | 324.1382   | 1.7063         | 110.0965  | 127.1228  | 153.1019 | 156.0191 |
| Glimepiride        | C <sub>4</sub> H <sub>11</sub> N <sub>5</sub>                     | 10.48 | +   | M+H        | <b>491.2323</b> | 491.2342   | 3.9124         | 292.0995  | 276.1928  | 271.1433 |          |
| Glipizide          | C <sub>27</sub> H <sub>36</sub> N <sub>2</sub> O <sub>4</sub>     | 8.06  | +   | M+H        | <b>446.1857</b> | 446.1865   | 1.7771         | 167.0162  | 111.0556  | 103.0547 | 286.0643 |
| Metformin          | C <sub>19</sub> H <sub>27</sub> N <sub>5</sub> O <sub>4</sub>     | 1.19  | +   | M+H        | <b>130.1087</b> | 130.1092   | 3.3924         | 98.0969   | 180.0806  | 96.0814  | 237.0603 |
| Repaglinide        | C <sub>23</sub> H <sub>36</sub> N <sub>2</sub> O <sub>2</sub>     | 8.92  | +   | M+H        | <b>453.2748</b> | 453.2755   | 1.6838         | 230.1903  | 86.0971   | 162.1277 | 174.1278 |
| Alfuzosin          | C <sub>21</sub> H <sub>30</sub> O <sub>2</sub>                    | 6.71  | +   | M+H        | <b>390.2136</b> | 390.2141   | 1.2834         | 71.0499   | 156.1020  | 235.1188 | 275.1494 |
| Finasteride        | C <sub>28</sub> H <sub>27</sub> NO <sub>4</sub> S                 | 9.90  | +   | M+H        | <b>373.2850</b> | 373.2857   | 2.0241         | 305.2582  | 317.2217  |          |          |
| Progesterone       | C <sub>22</sub> H <sub>30</sub> N <sub>6</sub> O <sub>4</sub> S   | 11.48 | +   | M+H        | <b>315.2319</b> | 315.2324   | 1.4619         | 97.0654   | 109.0653  | 123.0807 | 81.0706  |
| Raloxifene         | C <sub>8</sub> H <sub>9</sub> NO <sub>2</sub>                     | 7.35  | +   | M+H        | <b>474.1734</b> | 474.1743   | 1.8683         | 112.1124  | 84.0814   | 269.0266 |          |
| Sildenafil Citrate | C <sub>24</sub> H <sub>31</sub> NO <sub>8</sub>                   | 7.68  | +   | M+H        | <b>475.2122</b> | 475.2134   | 2.6092         | 58.0659   | 100.1000  |          |          |
| Acetaminophen      | C <sub>27</sub> H <sub>33</sub> NO <sub>10</sub> S                | 3.17  | +   | M+H        | <b>152.0706</b> | 152.0710   | 2.7597         | 110.0600  | 73.0648   | 59.0494  |          |
| Orphenadrine       | C <sub>9</sub> H <sub>8</sub> ClN <sub>5</sub> S                  | 7.84  | +   | M+H        | <b>270.1852</b> | 270.1857   | 1.8135         | 165.0699  | 181.1011  | 115.0545 | 141.0698 |
| Thiocolchicoside   | C <sub>16</sub> H <sub>25</sub> NO <sub>2</sub>                   | 6.46  | +   | M+H        | <b>564.1898</b> | 564.1913   | 2.6484         | 402.1363  | 360.1260  | 89.0603  |          |
| Tizanidine         | C <sub>17</sub> H <sub>27</sub> N <sub>3</sub> O <sub>4</sub> S   | 4.83  | +   | M+H        | <b>254.0262</b> | 254.0267   | 1.9796         | 55.9351   | 186.9353  |          |          |
| Tramadol           | C <sub>17</sub> H <sub>20</sub> N <sub>4</sub> S                  | 6.35  | +   | M+H        | <b>264.1958</b> | 264.1964   | 2.0443         | 58.0659   | 246.18623 |          |          |
| Amisulpride        | C <sub>21</sub> H <sub>25</sub> N <sub>3</sub> O <sub>2</sub> S   | 5.85  | +   | M+H        | <b>370.1795</b> | 370.1803   | 2.0729         | 242.0479  | 112.1124  | 155.1177 | 129.1386 |
| Olanzapine         | C <sub>23</sub> H <sub>27</sub> FN <sub>4</sub> O <sub>2</sub>    | 5.48  | +   | M+H        | <b>313.1481</b> | 313.1486   | 1.6625         | 256.9010  | 282.1057  | 84.0814  | 115.0545 |
| Quetiapine         | C <sub>15</sub> H <sub>12</sub> N <sub>2</sub> O                  | 7.44  | +   | M+H        | <b>384.1740</b> | 384.1747   | 1.7768         | 253.0790  | 221.1070  | 279.0950 |          |



| PhACs          | Formula                                                                        | RT    | ESI | Adduct Ion | m/z (theor)     | m/z (exp.) | $\Delta$ (ppm) | Fragments |          |                   |
|----------------|--------------------------------------------------------------------------------|-------|-----|------------|-----------------|------------|----------------|-----------|----------|-------------------|
| Risperidone    | C <sub>9</sub> H <sub>17</sub> NO <sub>2</sub>                                 | 6.88  | +   | M+H        | <b>411.2191</b> | 411.2198   | 1.8692         | 191.1177  | 110.0605 |                   |
| Carbamazepine  | C <sub>9</sub> H <sub>7</sub> Cl <sub>2</sub> N <sub>5</sub>                   | 7.66  | +   | M+H        | <b>237.1022</b> | 237.1025   | 1.1326         | 194.0966  | 179.0730 | 165.0700          |
| Gabapentin     | C <sub>8</sub> H <sub>17</sub> NO <sub>2</sub>                                 | 5.18  | +   | M+H        | <b>172.1332</b> | 172.1337   | 2.8322         | 62.9468   |          |                   |
| Lamotrigine    | C <sub>33</sub> H <sub>35</sub> FN <sub>2</sub> O <sub>5</sub>                 | 6.47  | +   | M+H        | <b>256.0151</b> | 256.0156   | 1.8143         | 119.0606  | 136.0757 | 234.0193 252.0298 |
| Pregabalin     | C <sub>19</sub> H <sub>20</sub> ClNO <sub>4</sub>                              | 5.07  | +   | M+H        | <b>160.1332</b> | 160.1335   | 2.0915         | 72.9377   | 55.9350  | 56.9429 51.9407   |
| Atorvastatin   | C <sub>10</sub> H <sub>11</sub> ClO <sub>3</sub>                               | 10.00 | +   | M+H        | <b>559.2603</b> | 559.2620   | 3.0091         | 440.2231  | 466.2022 | 292.1494 380.1643 |
| Bezafibrate    | C <sub>22</sub> H <sub>28</sub> FN <sub>3</sub> O <sub>6</sub> S               | 8.79  | +   | M+H        | <b>362.1154</b> | 362.1160   | 1.6757         | 138.9947  | 121.0650 | 161.0960 316.1089 |
| Clofibric Acid | C <sub>14</sub> H <sub>18</sub> N <sub>6</sub> O                               | 8.54  | -   | M-H        | <b>213.0323</b> | 213.0325   | 0.7297         | 91.0178   | 126.9946 | 135.0076 65.0020  |
| Rosuvastatin   | C <sub>8</sub> H <sub>12</sub> N <sub>5</sub> O <sub>4</sub> P                 | 8.07  | +   | M+H        | <b>482.1756</b> | 482.1754   |                | 446.1541  | 464.1648 | 376.1489 133.0446 |
| Abacavir       | C <sub>21</sub> H <sub>25</sub> ClN <sub>2</sub> O <sub>3</sub>                | 5.82  | +   | M+H        | <b>287.1615</b> | 287.1621   | 2.1221         | 191.1039  | 79.0549  | 150.0649 174.0776 |
| Adefovir       | C <sub>19</sub> H <sub>19</sub> ClN <sub>2</sub>                               | 8.15  | +   | M+H        | <b>502.2061</b> | 502.2072   | 2.1582         | 57.0707   | 274.0696 | 162.0774 358.1271 |
| Cetirizine     | C <sub>32</sub> H <sub>39</sub> NO <sub>2</sub>                                | 8.53  | +   | M+H        | <b>389.1627</b> | 389.1631   | 1.2770         | 201.0461  | 166.0779 |                   |
| Desloratadine  | C <sub>18</sub> H <sub>20</sub> N <sub>2</sub> S                               | 7.28  | +   | M+H        | <b>311.1310</b> | 311.1314   | 1.3136         | 259.1353  | 279.0805 | 242.0962 217.0888 |
| Ebastine       | C <sub>8</sub> H <sub>12</sub> ClNO <sub>2</sub>                               | 11.68 | +   | M+H        | <b>470.3054</b> | 470.3062   | 1.6847         | 167.0854  | 203.1428 | 161.0959          |
| Methdilazine   | C <sub>14</sub> H <sub>22</sub> N <sub>2</sub> O <sub>3</sub>                  | 8.20  | +   | M+H        | <b>297.1420</b> | 297.1425   | 1.8429         | 308.1249  | 175.0726 | 134.0600          |
| Dopamine       | C <sub>12</sub> H <sub>11</sub> ClN <sub>2</sub> O <sub>5</sub> S              | 1.22  | +   | M+H        | <b>154.0863</b> | 154.0865   | 1.4720         | 91.0547   | 65.0393  | 55.9352 119.0493  |
| Trimetazidine  | C <sub>16</sub> H <sub>16</sub> ClN <sub>3</sub> O <sub>3</sub> S              | 3.57  | +   | M+H        | <b>267.1703</b> | 267.1707   | 1.4797         | 145.0644  | 74.0404  | 56.0501 98.9756   |
| Furosemide     | C <sub>29</sub> H <sub>33</sub> ClN <sub>2</sub> O <sub>2</sub>                | 6.98  | -   | M-H        | <b>329.0004</b> | 329.0012   | 2.4018         | 204.9839  | 77.9643  | 126.0105          |
| Indapamide     | C <sub>43</sub> H <sub>51</sub> N <sub>3</sub> O <sub>11</sub>                 | 7.08  | +   | M+H        | <b>366.0674</b> | 366.0687   | 3.5364         | 298.1682  | 316.1796 | 284.1551 280.1597 |
| Loperamide     | C <sub>16</sub> H <sub>14</sub> F <sub>3</sub> N <sub>3</sub> O <sub>2</sub> S | 8.70  | +   | M+H        | <b>477.2303</b> | 477.2312   | 1.8244         | 121.0396  | 95.0607  |                   |
| Rifaximin      | C <sub>17</sub> H <sub>19</sub> N <sub>3</sub> O <sub>3</sub> S                | 9.95  | +   | M+H        | <b>786.3596</b> | 786.3594   | -0.2085        | 754.3322  | 362.1130 | 151.0753 123.0806 |
| Lansoprazole   | C <sub>16</sub> H <sub>15</sub> F <sub>2</sub> N <sub>3</sub> O <sub>4</sub> S | 7.64  | +   | M+H        | <b>370.0832</b> | 370.0835   | 0.8257         | 261.1032  | 318.1609 | 122.0403          |
| Omeprazole     | C <sub>13</sub> H <sub>12</sub> F <sub>2</sub> N <sub>6</sub> O                | 8.36  | +   | M+H        | <b>346.1220</b> | 346.1223   | 0.9967         | 136.0757  | 180.0476 | 151.0992 108.0811 |
| Pantoprazole   | C <sub>16</sub> H <sub>14</sub> F <sub>3</sub> N <sub>5</sub> O                | 7.20  | +   | M+H        | <b>384.0824</b> | 384.0830   | 1.5825         | 138.0549  | 200.0375 | 154.0498          |
| Fluconazole    | C <sub>8</sub> H <sub>12</sub> N <sub>2</sub>                                  | 6.40  | +   | M+H        | <b>307.1113</b> | 307.1118   | 1.6506         | 238.0784  | 220.0679 | 169.0459 127.0355 |
| Voriconazole   | C <sub>26</sub> H <sub>28</sub> N <sub>2</sub>                                 | 8.25  | +   | M+H        | <b>350.1223</b> | 350.1230   | 2.0761         | 127.0356  | 281.0896 | 224.0628          |
| Betahistine    | C <sub>21</sub> H <sub>28</sub> O <sub>5</sub>                                 | 1.29  | +   | M+H        | <b>137.1073</b> | 137.1077   | 2.7808         | 94.0656   | 72.9373  | 90.9483 55.9352   |
| Cinnarizine    | C <sub>25</sub> H <sub>31</sub> F <sub>3</sub> O <sub>5</sub> S                | 9.26  | +   | M+H        | <b>369.2325</b> | 369.2332   | 1.8561         | 167.0855  | 152.0620 | 165.0701          |
| Prednisolone   | C <sub>10</sub> H <sub>16</sub> N <sub>6</sub> S                               | 7.63  | +   | M+H        | <b>361.2010</b> | 361.2013   | 0.8138         | 174.0806  | 121.0646 | 91.0551 173.0965  |
| Fluticasone    | C <sub>13</sub> H <sub>22</sub> N <sub>4</sub> O <sub>5</sub> S                | 10.38 | +   | M+H        | <b>501.1917</b> | 501.1928   | 2.1949         | 293.1530  | 275.1430 | 313.1601          |



| PhACs         | Formula                                                          | RT    | ESI | Adduct Ion | m/z (theor)     | m/z (exp.) | $\Delta$ (ppm) | Fragments |          |          |          |
|---------------|------------------------------------------------------------------|-------|-----|------------|-----------------|------------|----------------|-----------|----------|----------|----------|
| Cimetidine    | C <sub>14</sub> H <sub>22</sub> N <sub>2</sub> O                 | 3.45  | +   | M+H        | <b>253.1230</b> | 253.1234   | 1.4303         | 95.0610   | 117.0485 | 159.0701 | 99.0671  |
| Ranitidine    | C <sub>13</sub> H <sub>20</sub> N <sub>2</sub> O                 | 3.76  | +   | M+H        | <b>315.1485</b> | 315.1491   | 1.7083         | 176.0491  | 130.0560 | 102.0376 | 125.0057 |
| Lidocaine     | C <sub>22</sub> H <sub>26</sub> N <sub>2</sub> O <sub>4</sub> S  | 5.92  | +   | M+H        | <b>235.1805</b> | 235.1810   | 2.1026         | 100.0761  | 222.0912 | 56.0503  |          |
| Prilocaine    | C <sub>17</sub> H <sub>18</sub> N <sub>2</sub> O <sub>6</sub>    | 6.08  | +   | M+H        | <b>221.1648</b> | 221.1653   | 2.0729         | 86.0970   |          |          |          |
| Diltiazem     | C <sub>22</sub> H <sub>19</sub> NO <sub>4</sub>                  | 7.58  | +   | M+H        | <b>415.1686</b> | 415.1692   | 1.4198         | 178.0321  | 137.0595 | 150.0372 |          |
| Nifedipine    | C <sub>14</sub> H <sub>21</sub> Br <sub>2</sub> ClN <sub>2</sub> | 8.34  | +   | M+H        | <b>347.1238</b> | 347.1232   | -1.7027        | 333.1079  | 138.0551 | 315.0973 |          |
| Bisacodyl     | C <sub>10</sub> H <sub>17</sub> N <sub>3</sub> S                 | 7.93  | +   | M+H        | <b>362.1387</b> | 362.1392   | 1.3259         | 184.0757  | 167.0729 | 226.0864 | 320.1274 |
| Bromhexine    | C <sub>13</sub> H <sub>21</sub> NO <sub>3</sub>                  | 7.86  | +   | M+H        | <b>375.0066</b> | 375.0073   | 1.9312         | 263.8752  | 261.8773 | 114.1262 |          |
| Pramipexole   | C <sub>16</sub> H <sub>16</sub> ClNO <sub>2</sub> S              | 1.21  | +   | M+H        | <b>212.1216</b> | 212.1220   | 1.7608         | 111.0443  | 103.0546 | 166.0860 | 131.0492 |
| Salbutamol    | C <sub>15</sub> H <sub>11</sub> I <sub>4</sub> NO <sub>4</sub>   | 3.03  | +   | M+H        | <b>240.1594</b> | 240.1598   | 1.7314         | 148.0756  | 166.0862 | 222.1486 |          |
| Clopidogrel   | C <sub>8</sub> H <sub>10</sub> N <sub>4</sub> O <sub>2</sub>     | 9.55  | +   | M+H        | 322.0663        | 322.0661   |                | 212.0473  | 184.0516 | 125.0154 | 155.0248 |
| Levothyroxine | C <sub>12</sub> H <sub>7</sub> Cl <sub>3</sub> O <sub>2</sub>    | 8.95  | +   | M+H        | <b>777.6940</b> | 777.6958   | 2.3155         | 86.0970   | 731.6902 | 604.7806 |          |
| Caffeine      | C <sub>9</sub> H <sub>8</sub> O <sub>4</sub>                     | 5.99  | +   | M+H        | <b>195.0877</b> | 195.0882   | 2.7977         | 138.0663  | 110.0716 | 83.0610  | 69.0455  |
| Triclosan     | C <sub>12</sub> H <sub>17</sub> NO                               | 11.93 | -   | M-H        | <b>286.9438</b> | 286.9438   | -0.1530        | 307.4193  | 255.2432 | 191.3187 | 174.6795 |
| Caffeic Acid  | C <sub>13</sub> H <sub>10</sub> O <sub>3</sub>                   | 5.81  | -   | M-H        | <b>179.0349</b> | 179.0345   | -2.4892        | 135.0442  | 133.0292 | 89.0383  |          |
| DEET          | C <sub>13</sub> H <sub>10</sub> O <sub>5</sub>                   | 8.17  | +   | M+H        | <b>192.1383</b> | 192.1387   | 2.2531         | 119.0494  | 109.0652 | 91.0548  | 65.0393  |
| BP1           | C <sub>14</sub> H <sub>12</sub> O <sub>3</sub>                   | 8.47  | -   | M-H        | <b>213.0557</b> | 213.0555   | -1.1713        | 91.0178   | 126.9946 | 153.0186 | 135.0076 |
| BP2           | C <sub>7</sub> H <sub>7</sub> NO <sub>2</sub>                    | 7.12  | -   | M-H        | <b>245.0455</b> | 245.0457   | 0.8787         | 109.0284  | 91.0178  | 153.0181 | 65.0385  |
| BP3           | C <sub>19</sub> H <sub>21</sub> NO <sub>4</sub>                  | 8.70  | +   | M+H        | <b>229.0859</b> | 229.0870   | 4.9594         | 169.0645  | 158.0359 |          |          |
| PABA          | C <sub>16</sub> H <sub>14</sub> FN <sub>3</sub> O                | 3.00  | +   | M+H        | <b>138.0550</b> | 138.0554   | 2.8206         | 65.0393   | 92.0500  |          |          |

\*Quantitation ions in bold

**Table S7** Summary of mean recoveries (%R), precision (%RSD<sub>R</sub>, n=6) and method quantification limits (MQL) in the two different matrices and matrix effect study results on effluents

| Compounds        | Influent              |                   |                        |                   |        | Effluent              |                   |                        |                   |        |
|------------------|-----------------------|-------------------|------------------------|-------------------|--------|-----------------------|-------------------|------------------------|-------------------|--------|
|                  | 50 ng L <sup>-1</sup> |                   | 100 ng L <sup>-1</sup> |                   | MQL    | 50 ng L <sup>-1</sup> |                   | 100 ng L <sup>-1</sup> |                   | MQL    |
|                  | % R                   | %RSD <sub>R</sub> | % R                    | %RSD <sub>R</sub> | (ng/L) | % R                   | %RSD <sub>R</sub> | % R                    | %RSD <sub>R</sub> | (ng/L) |
| Amoxicillin      | 50                    | 20                | 51                     | 27                | 10.0   | 55                    | 20                | 53                     | 21                | 10.0   |
| Ampicillin       | 47                    | 28                | 58                     | 21                | 20.0   | 43                    | 17                | 55                     | 18                | 20.0   |
| Azithromycin     | 70                    | 14                | 74                     | 15                | 10.0   | 68                    | 9                 | 72                     | 11                | 10.0   |
| Ciprofloxacin    | 96                    | 35                | 99                     | 27                | 3.8    | 98                    | 31                | 104                    | 31                | 3.9    |
| Clarithromycin   | 70                    | 15                | 64                     | 9                 | 10.0   | 62                    | 9                 | 65                     | 10                | 10.0   |
| Erythromycin     | 60                    | 10                | 72                     | 11                | 0.1    | 55                    | 11                | 72                     | 10                | 0.1    |
| Isoniazide       | <30                   | 22                | 31                     | 19                | 25.0   | <30                   | 20                | 31                     | 16                | 25.0   |
| Levofloxacin     | 38                    | 10                | 39                     | 10                | 10.0   | 33                    | 10                | 35                     | 10                | 10.0   |
| Lincomycin       | 75                    | 30                | 82                     | 23                | 0.1    | 79                    | 27                | 85                     | 26                | 0.1    |
| Metronidazole    | 92                    | 35                | 98                     | 26                | 1.0    | 97                    | 30                | 105                    | 28                | 1.1    |
| Moxifloxacin     | 51                    | 10                | 65                     | 10                | 1.1    | 53                    | 10                | 60                     | 10                | 1.1    |
| Norfloxacin      | 39                    | 6                 | 45                     | 7                 | 7.1    | 45                    | 7                 | 49                     | 3                 | 7.9    |
| Roxithromycin    | 70                    | 10                | 68                     | 10                | 20.0   | 72                    | 10                | 67                     | 10                | 1.0    |
| Sulfadiazine     | 115                   | 35                | 121                    | 27                | 1.1    | 118                   | 31                | 126                    | 31                | 1.1    |
| Sulfamethoxazole | 92                    | 25                | 97                     | 20                | 0.4    | 97                    | 23                | 105                    | 19                | 0.4    |
| Trimethoprim     | 124                   | 28                | 132                    | 21                | 0.0    | 130                   | 24                | 139                    | 22                | 0.0    |
| Acetofenac       | 113                   | 15                | 130                    | 13                | 2.8    | 122                   | 14                | 132                    | 10                | 2.9    |
| Celecoxib        | 72                    | 11                | 71                     | 13                | 0.5    | 76                    | 12                | 81                     | 7                 | 0.6    |
| Diclofenac       | 94                    | 31                | 97                     | 23                | 5.0    | 103                   | 27                | 111                    | 21                | 5.0    |
| Etoricoxib       | 95                    | 13                | 104                    | 11                | 0.1    | 101                   | 12                | 108                    | 9                 | 0.1    |
| Indomethacin     | 96                    | 16                | 104                    | 14                | 1.0    | 101                   | 15                | 108                    | 13                | 1.0    |
| Ketoprofen       | 139                   | 36                | 150                    | 30                | 0.5    | 144                   | 33                | 153                    | 31                | 0.5    |
| Lornoxicam       | 73                    | 16                | 79                     | 13                | 1.1    | 79                    | 14                | 86                     | 10                | 1.2    |
| Naproxen         | 106                   | 8                 | 108                    | 7                 | 1.0    | 109                   | 8                 | 117                    | 6                 | 1.0    |
| Nimesulide       | 44                    | 10                | 47                     | 10                | 10.0   | 51                    | 17                | 53                     | 10                | 10.0   |
| Piroxicam        | 49                    | 15                | 55                     | 12                | 1.9    | 55                    | 14                | 60                     | 10                | 2.1    |
| Tolfenamic Acid  | 83                    | 7                 | 88                     | 5                 | 0.7    | 89                    | 6                 | 95                     | 4                 | 0.7    |
| Alprazolam       | 102                   | 17                | 107                    | 14                | 0.6    | 106                   | 15                | 113                    | 13                | 0.6    |
| Bromazepam       | 84                    | 16                | 91                     | 13                | 0.9    | 93                    | 14                | 101                    | 7                 | 1.0    |
| Buspirone        | 64                    | 26                | 75                     | 20                | 0.1    | 69                    | 23                | 74                     | 23                | 0.1    |
| Clobazam         | 102                   | 19                | 88                     | 10                | 5.0    | 102                   | 16                | 121                    | 12                | 5.8    |
| Diazepam         | 103                   | 15                | 112                    | 15                | 0.1    | 111                   | 15                | 119                    | 8                 | 0.1    |
| Flunitrazepam    | 120                   | 12                | 95                     | 11                | 6.4    | 88                    | 8                 | 122                    | 8                 | 6.2    |
| Lorazepam        | 102                   | 14                | 85                     | 13                | 0.7    | 89                    | 11                | 106                    | 13                | 0.8    |
| Midazolam        | 64                    | 11                | 71                     | 10                | 0.4    | 81                    | 8                 | 84                     | 6                 | 0.5    |
| Oxazepam         | 88                    | 15                | 95                     | 13                | 2.7    | 92                    | 11                | 109                    | 10                | 3.0    |
| Triazolam        | 107                   | 14                | 113                    | 11                | 10.0   | 114                   | 13                | 123                    | 8                 | 10.0   |
| Amitriptyline    | 51                    | 25                | 63                     | 21                | 1.0    | 60                    | 23                | 66                     | 19                | 1.2    |
| Bupropion        | 72                    | 33                | 82                     | 24                | 0.1    | 77                    | 28                | 83                     | 28                | 0.1    |
| Citalopram       | 63                    | 38                | 71                     | 26                | 0.1    | 68                    | 32                | 73                     | 31                | 0.2    |
| Doxepin          | 45                    | 15                | 47                     | 9                 | 10.0   | 50                    | 10                | 48                     | 11                | 10.0   |
| Duloxetine       | 82                    | 12                | 85                     | 11                | 5.0    | 71                    | 10                | 75                     | 11                | 5.0    |



| Compounds        | Influent              |                   |                        |                   |               | Effluent              |                   |                        |                   |               |
|------------------|-----------------------|-------------------|------------------------|-------------------|---------------|-----------------------|-------------------|------------------------|-------------------|---------------|
|                  | 50 ng L <sup>-1</sup> |                   | 100 ng L <sup>-1</sup> |                   | MQL<br>(ng/L) | 50 ng L <sup>-1</sup> |                   | 100 ng L <sup>-1</sup> |                   | MQL<br>(ng/L) |
|                  | % R                   | %RSD <sub>R</sub> | % R                    | %RSD <sub>R</sub> |               | % R                   | %RSD <sub>R</sub> | % R                    | %RSD <sub>R</sub> |               |
| Fluvoxamine      | 34                    | 38                | 49                     | 30                | 2.7           | 39                    | 34                | 43                     | 33                | 2.7           |
| Sertraline       | 36                    | 27                | 42                     | 20                | 5.5           | 43                    | 23                | 48                     | 20                | 5.5           |
| Venlafaxine      | 92                    | 36                | 101                    | 27                | 0.1           | 98                    | 27                | 106                    | 21                | 0.1           |
| Capecitabine     | 98                    | 14                | 102                    | 11                | 10.0          | 105                   | 13                | 113                    | 8                 | 10.0          |
| Cyclophosphamide | 100                   | 14                | 111                    | 14                | 0.1           | 106                   | 14                | 114                    | 11                | 0.1           |
| Cytarabine       | <30                   | 10                | <30                    | 10                | 10.0          | <30                   | 10                | <30                    | 10                | 10.0          |
| Dacarbazine      | 88                    | 34                | 92                     | 24                | 10.0          | 95                    | 29                | 103                    | 25                | 10.0          |
| Doxorubicin      | <30                   | 23                | 36                     | 19                | 3.4           | 34                    | 21                | 38                     | 17                | 3.9           |
| Methotrexate     | 81                    | 21                | 84                     | 15                | 1.9           | 85                    | 18                | 92                     | 16                | 2.0           |
| Tamoxifen        | <30                   | 10                | <30                    | 11                | 7.0           | <30                   | 10                | <30                    | 11                | 7.0           |
| Viblastine       | <30                   | 10                | <30                    | 9                 | 10.0          | <30                   | 10                | <30                    | 11                | 10.0          |
| Atenolol         | 56                    | 21                | 60                     | 15                | 0.1           | 63                    | 18                | 69                     | 14                | 0.1           |
| Bisoprolol       | 76                    | 18                | 77                     | 13                | 0.1           | 82                    | 16                | 89                     | 12                | 0.1           |
| Carvedilol       | <30                   | 19                | <30                    | 15                | 0.1           | <30                   | 17                | 33                     | 13                | 0.1           |
| Metoprolol       | 84                    | 18                | 87                     | 14                | 0.1           | 88                    | 16                | 95                     | 14                | 0.1           |
| Pindolol         | 86                    | 29                | 88                     | 20                | 0.1           | 89                    | 24                | 95                     | 24                | 0.1           |
| Propranolol      | 114                   | 33                | 120                    | 23                | 0.2           | 123                   | 28                | 133                    | 23                | 0.2           |
| Timolol          | 101                   | 21                | 107                    | 17                | 0.3           | 106                   | 19                | 114                    | 16                | 0.3           |
| Enalapril        | 93                    | 10                | 96                     | 9                 | 0.3           | 96                    | 9                 | 103                    | 8                 | 0.3           |
| Irbesartan       | 91                    | 17                | 93                     | 14                | 0.1           | 98                    | 16                | 105                    | 10                | 0.1           |
| Losartan         | 87                    | 15                | 93                     | 13                | 0.3           | 92                    | 14                | 99                     | 11                | 0.3           |
| Ramipril         | 99                    | 12                | 105                    | 11                | 0.3           | 106                   | 12                | 113                    | 7                 | 0.3           |
| Telmisartan      | 93                    | 28                | 96                     | 21                | 0.7           | 97                    | 24                | 104                    | 23                | 0.7           |
| Valsartan        | 88                    | 14                | 90                     | 12                | 1.1           | 97                    | 13                | 105                    | 6                 | 1.1           |
| Glibenclamide    | 99                    | 19                | 107                    | 18                | 5.5           | 105                   | 19                | 113                    | 13                | 5.5           |
| Gliclazide       | 67                    | 26                | 70                     | 19                | 0.3           | 73                    | 23                | 80                     | 19                | 0.4           |
| Glimepiride      | 95                    | 10                | 96                     | 8                 | 4.1           | 101                   | 9                 | 109                    | 5                 | 4.1           |
| Glipizide        | 98                    | 10                | 99                     | 7                 | 0.8           | 103                   | 9                 | 111                    | 6                 | 0.9           |
| Metformin        | <30                   | 9                 | <30                    | 9                 | 1.1           | <30                   | 9                 | <30                    | 7                 | 1.2           |
| Repaglinide      | 87                    | 10                | 89                     | 7                 | 0.2           | 90                    | 9                 | 96                     | 9                 | 0.2           |
| Alfuzosin        | 81                    | 8                 | 87                     | 6                 | 0.1           | 85                    | 7                 | 92                     | 5                 | 0.1           |
| Finasteride      | 97                    | 10                | 101                    | 8                 | 0.2           | 104                   | 9                 | 112                    | 5                 | 0.2           |
| Progesterone     | 94                    | 17                | 99                     | 15                | 0.2           | 99                    | 16                | 106                    | 13                | 0.2           |
| Raloxifene       | <30                   | 25                | 34                     | 20                | 0.3           | 34                    | 22                | 39                     | 16                | 0.4           |
| Sildenafil       | <30                   | 15                | 40                     | 12                | 1.2           | 34                    | 14                | 39                     | 10                | 1.3           |
| Acetaminophen    | 105                   | 25                | 111                    | 19                | 1.2           | 115                   | 22                | 125                    | 14                | 1.3           |
| Orphenadrine     | 32                    | 29                | 43                     | 25                | 0.5           | 36                    | 27                | 39                     | 25                | 0.5           |
| Thiocolchicoside | 77                    | 21                | 80                     | 16                | 0.8           | 81                    | 18                | 87                     | 18                | 0.9           |
| Tizanidine       | 104                   | 34                | 111                    | 26                | 0.4           | 106                   | 30                | 113                    | 31                | 0.4           |
| Tramadol         | 83                    | 26                | 87                     | 19                | 0.1           | 88                    | 22                | 94                     | 21                | 0.1           |
| Amisulpride      | 82                    | 29                | 90                     | 23                | 0.2           | 90                    | 26                | 97                     | 22                | 0.2           |
| Olanzapine       | 90                    | 10                | 96                     | 9                 | 6.6           | 82                    | 10                | 89                     | 10                | 6.6           |
| Quetiapine       | <30                   | 10                | <30                    | 9                 | 10.0          | <30                   | 10                | <30                    | 9                 | 10.0          |
| Risperidone      | 49                    | 23                | 56                     | 19                | 0.1           | 53                    | 21                | 58                     | 19                | 0.1           |
| Carbamazepine    | 92                    | 9                 | 97                     | 8                 | 0.7           | 98                    | 8                 | 106                    | 5                 | 0.7           |



| Compounds          | Influent              |                   |                        |                   |        | Effluent              |                   |                        |                   |        |
|--------------------|-----------------------|-------------------|------------------------|-------------------|--------|-----------------------|-------------------|------------------------|-------------------|--------|
|                    | 50 ng L <sup>-1</sup> |                   | 100 ng L <sup>-1</sup> |                   | MQL    | 50 ng L <sup>-1</sup> |                   | 100 ng L <sup>-1</sup> |                   | MQL    |
|                    | % R                   | %RSD <sub>R</sub> | % R                    | %RSD <sub>R</sub> | (ng/L) | % R                   | %RSD <sub>R</sub> | % R                    | %RSD <sub>R</sub> | (ng/L) |
| Gabapentin         | <30                   | 10                | <30                    | 9                 | 10.0   | <30                   | 10                | <30                    | 10                | 10.0   |
| Lamotrigine        | 94                    | 15                | 103                    | 14                | 0.1    | 103                   | 14                | 112                    | 7                 | 0.1    |
| Pregabalin         | <30                   | 8                 | <30                    | 8                 | 2.1    | <30                   | 8                 | <30                    | 2                 | 3.1    |
| Atorvastatin       | 58                    | 10                | 63                     | 9                 | 1.5    | 64                    | 9                 | 69                     | 6                 | 1.7    |
| Bezafibrate        | 105                   | 15                | 112                    | 13                | 0.5    | 110                   | 14                | 118                    | 12                | 0.5    |
| Clofibric acid     | 94                    | 14                | 89                     | 15                | 0.5    | 95                    | 15                | 101                    | 11                | 0.5    |
| Rosuvastatin       | 96                    | 17                | 98                     | 13                | 21.7   | 101                   | 15                | 108                    | 12                | 23.5   |
| Cetirizine         | 69                    | 26                | 75                     | 21                | 1.9    | 73                    | 23                | 79                     | 22                | 2.0    |
| Desloratadine      | <30                   | 16                | 31                     | 13                | 0.9    | 30                    | 15                | 34                     | 11                | 1.1    |
| Ebastine           | <30                   | 15                | <30                    | 11                | 0.3    | <30                   | 13                | <30                    | 13                | 0.3    |
| Methdilazine       | 58                    | 9                 | 64                     | 9                 | 10.0   | 50                    | 10                | 59                     | 10                | 10.0   |
| Lansoprazole       | 65                    | 29                | 69                     | 22                | 3.4    | 71                    | 25                | 78                     | 22                | 3.7    |
| Omeprazole         | 83                    | 28                | 82                     | 19                | 22.3   | 87                    | 24                | 93                     | 24                | 24.3   |
| Pantoprazole       | 79                    | 26                | 82                     | 19                | 0.2    | 83                    | 22                | 89                     | 21                | 0.3    |
| Loperamide         | 79                    | 38                | 89                     | 29                | 0.9    | 85                    | 34                | 91                     | 32                | 0.9    |
| Rifaximin          | 31                    | 20                | 43                     | 19                | 5.6    | 34                    | 19                | 37                     | 18                | 5.4    |
| Abacavir           | 86                    | 13                | 87                     | 11                | 0.3    | 89                    | 12                | 96                     | 11                | 0.3    |
| Adefovir           | 86                    | 7                 | 91                     | 6                 | 1.0    | 92                    | 6                 | 99                     | 3                 | 1.1    |
| Furosemide         | 87                    | 8                 | 93                     | 7                 | 1.1    | 91                    | 8                 | 97                     | 6                 | 1.1    |
| Indapamide         | 71                    | 21                | 72                     | 16                | 0.5    | 75                    | 18                | 80                     | 18                | 0.6    |
| Dopamine           | <30                   | 9                 | <30                    | 9                 | 10.0   | <30                   | 10                | <30                    | 10                | 10.0   |
| Trimetazidine      | 82                    | 28                | 87                     | 22                | 1.2    | 88                    | 25                | 95                     | 21                | 1.3    |
| Fluconazole        | 104                   | 13                | 111                    | 11                | 0.4    | 110                   | 12                | 118                    | 9                 | 0.4    |
| Voriconazole       | 107                   | 15                | 114                    | 13                | 0.1    | 109                   | 14                | 117                    | 13                | 0.1    |
| Betahistine        | 35                    | 10                | 48                     | 10                | 0.7    | 40                    | 10                | 44                     | 8                 | 0.7    |
| Cinnarizine        | 73                    | 9                 | 80                     | 9                 | 10.0   | 68                    | 10                | 72                     | 10                | 10.0   |
| Prednisolone       | 90                    | 19                | 99                     | 17                | 0.7    | 94                    | 18                | 101                    | 10                | 0.7    |
| Fluticasone        | 92                    | 18                | 103                    | 16                | 10.0   | 95                    | 17                | 102                    | 15                | 10.0   |
| Cimetidine         | <30                   | 9                 | 39                     | 9                 | 10.0   | <30                   | 10                | 41                     | 10                | 10.0   |
| Ranitidine         | 48                    | 9                 | 49                     | 9                 | 10.0   | 54                    | 10                | 57                     | 10                | 10.0   |
| Lidocaine          | 78                    | 35                | 81                     | 26                | 0.1    | 81                    | 30                | 87                     | 31                | 0.1    |
| Prilocaine         | 66                    | 19                | 76                     | 16                | 0.1    | 73                    | 18                | 79                     | 13                | 0.1    |
| Diltiazem          | 41                    | 9                 | 40                     | 9                 | 10.0   | 42                    | 10                | 40                     | 10                | 10.0   |
| Nifedipine         | 39                    | 10                | 50                     | 11                | 3.0    | 46                    | 10                | 51                     | 5                 | 3.2    |
| Bisacodyl          | 78                    | 14                | 87                     | 12                | 0.1    | 88                    | 13                | 95                     | 8                 | 0.1    |
| Bromhexine         | 46                    | 19                | 54                     | 14                | 0.4    | 52                    | 16                | 57                     | 13                | 0.4    |
| Pramipexole        | 45                    | 18                | 51                     | 15                | 1.3    | 47                    | 16                | 51                     | 16                | 1.3    |
| Salbutamol         | 60                    | 9                 | 58                     | 9                 | 10.0   | 60                    | 10                | 65                     | 10                | 10.0   |
| Clopidogrel        | 71                    | 13                | 75                     | 11                | 0.1    | 73                    | 12                | 78                     | 12                | 0.1    |
| Levothyroxine (T4) | 41                    | 20                | 45                     | 14                | 49.0   | 44                    | 17                | 48                     | 17                | 44.0   |
| Caffeine           | 138                   | 32                | 143                    | 22                | 0.5    | 143                   | 27                | 153                    | 26                | 0.5    |
| Triclosan          | 73                    | 6                 | 77                     | 6                 | 0.5    | 79                    | 6                 | 85                     | 2                 | 0.5    |
| Caffeic acid       | 40                    | 9                 | 39                     | 9                 | 10.0   | 42                    | 10                | 40                     | 10                | 10.0   |
| DEET               | 90                    | 22                | 97                     | 18                | 0.1    | 96                    | 20                | 104                    | 16                | 0.1    |
| BP1                | 69                    | 5                 | 66                     | 6                 | 0.4    | 72                    | 5                 | 77                     | 2                 | 0.4    |



| Compounds | Influent              |                   |                        |                   |        | Effluent              |                   |                        |                   |        |
|-----------|-----------------------|-------------------|------------------------|-------------------|--------|-----------------------|-------------------|------------------------|-------------------|--------|
|           | 50 ng L <sup>-1</sup> |                   | 100 ng L <sup>-1</sup> |                   | MQL    | 50 ng L <sup>-1</sup> |                   | 100 ng L <sup>-1</sup> |                   | MQL    |
|           | % R                   | %RSD <sub>R</sub> | % R                    | %RSD <sub>R</sub> | (ng/L) | % R                   | %RSD <sub>R</sub> | % R                    | %RSD <sub>R</sub> | (ng/L) |
| BP2       | 50                    | 13                | 54                     | 13                | 0.2    | 54                    | 13                | 59                     | 9                 | 0.2    |
| BP3       | 86                    | 14                | 89                     | 11                | 0.7    | 91                    | 12                | 98                     | 9                 | 0.7    |
| PABA      | 71                    | 33                | 77                     | 26                | 6.3    | 77                    | 30                | 83                     | 26                | 6.8    |

**Table S8** Occurrence (ng/L) for PhACs detected in the effluents of the studied WWTP. Concentrations (ng/L) are calculated as the minimum, maximum and average from all sampling campaigns

| PhACs            | Min. | Max.  | Mean  | (%) Detection frequency |
|------------------|------|-------|-------|-------------------------|
| Ciprofloxacin    | <MDL | 119.7 | 49.04 | 82                      |
| Erythromycin     | <MDL | 0.1   | <MQL  | 38                      |
| Trimethoprim     | <MDL | 12.9  | <MQL  | 64                      |
| Clarithromycin   | <MDL | 14.0  | <MQL  | 30                      |
| Azithromycin     | <MDL | 25.4  | <MQL  | 34                      |
| Sulfadiazine     | <MDL | 5.7   | <MQL  | 5                       |
| Sulfamethoxazole | <MDL | 2.5   | 0.49  | 14                      |
| Roxithromycin    | <MDL | 11.9  | <MQL  | 17                      |
| Levofloxacin     | <MDL | 68.3  | 26.41 | 55                      |
| Clindamycin      | <MDL | <MDL  | <MQL  | 0                       |
| Norfloxacin      | <MDL | 44.9  | 9.06  | 27                      |
| Moxifloxacin     | <MDL | 44.2  | 17.67 | 55                      |
| Lincomycin       | <MDL | 102.3 | 4.03  | 14                      |
| Metronidazole    | <MDL | 14.5  | 3.79  | 14                      |
| Amoxicillin      | <MDL | <MDL  | <MQL  | 0                       |
| Ampicillin       | <MDL | <MDL  | <MQL  | 0                       |
| Cefadroxil       | <MDL | <MDL  | <MQL  | 0                       |
| Rifaximin        | <MDL | <MDL  | <MQL  | 5                       |
| Piroxicam        | <MDL | 4.1   | <MQL  | 14                      |
| Lornoxicam       | <MDL | <MDL  | <MQL  | 0                       |
| Nimesulide       | <MDL | 5.0   | <MQL  | 50                      |
| Naproxen         | <MDL | 14.8  | 2.29  | 27                      |
| Diclofenac       | <MDL | 118.8 | 42.42 | 95                      |
| Ketoprofen       | <MDL | 33.7  | 18.27 | 68                      |
| Aceclofenac      | <MDL | <MDL  | <MQL  | 0                       |
| Indomethacin     | <MDL | <MDL  | <MQL  | 0                       |
| Celecoxib        | <MDL | <MDL  | <MQL  | 14                      |
| TolfenamicAcid   | <MDL | 205.2 | 8.64  | 14                      |
| Etoricoxib       | <MDL | 0.1   | <MQL  | 100                     |
| SalicylicAcid    | <MDL | 148.3 | 34.21 | 100                     |
| Paracetamol      | <MDL | 32.5  | 13.73 | 100                     |
| Tramadol         | <MDL | 70.6  | 27.18 | 77                      |
| Thiocolchicoside | <MDL | <MDL  | <MQL  | 0                       |
| Tizanidine       | <MDL | 16.1  | <MQL  | 5                       |
| Doxepin          | <MDL | <MDL  | <MQL  | 0                       |
| Amitriptyline    | <MDL | <MDL  | <MQL  | 0                       |



| PhACs            | Min.  | Max.   | Mean    | (%) Detection frequency |
|------------------|-------|--------|---------|-------------------------|
| Duloxetine       | <MDL  | 17.2   | <MQL    | 0                       |
| Bupropion        | <MDL  | 0.1    | <MQL    | 0                       |
| Fluvoxamine      | <MDL  | <MDL   | <MQL    | 0                       |
| Citalopram       | <MDL  | <MDL   | <MQL    | 0                       |
| Venlafaxine      | <MDL  | 9.6    | <MQL    | 68                      |
| Triazolam        | <MDL  | <MDL   | <MQL    | 0                       |
| Sertraline       | <MDL  | <MDL   | <MQL    | 5                       |
| Amisulpride      | <MDL  | 0.1    | <MQL    | 36                      |
| Quetiapine       | <MDL  | <MDL   | <MQL    | 0                       |
| Risperidone      | <MDL  | 0.1    | <MQL    | 50                      |
| Olanzapine       | <MDL  | <MDL   | <MQL    | 0                       |
| Alprazolam       | <MDL  | <MDL   | <MQL    | 0                       |
| Diazepam         | <MDL  | 0.1    | <MQL    | 0                       |
| Bromazepam       | <MDL  | <MDL   | <MQL    | 0                       |
| Buspirone        | <MDL  | <MDL   | <MQL    | 0                       |
| 5-Fluorouracil   | <MDL  | <MDL   | <MQL    | 0                       |
| Tamoxifen        | <MDL  | 20.2   | <MQL    | 34                      |
| Cyclophosphamide | <MDL  | 759.9  | 25.92   | 5                       |
| Cytarabine       | <MDL  | 32.6   | <MQL    | 17                      |
| Etoposide        | <MDL  | <MDL   | <MQL    | 0                       |
| Viblastine       | <MDL  | <MDL   | <MQL    | 0                       |
| Capecitabine     | <MDL  | <MDL   | <MQL    | 0                       |
| Dacarbazine      | <MDL  | <MDL   | <MQL    | 0                       |
| Methotrexate     | <MDL  | <MDL   | <MQL    | 0                       |
| Doxorubicin      | <MDL  | <MDL   | <MQL    | 0                       |
| Telmisartan      | <MDL  | 133.2  | 75.53   | 86                      |
| Valsartan        | <MDL  | 3340.2 | 1398.32 | 86                      |
| Losartan         | <MQL  | 27.0   | 9.45    | 68                      |
| Irbesartan       | 184.1 | 2452.2 | 1816.87 | 100                     |
| Captopril        | <MDL  | <MDL   | <MQL    | 0                       |
| Methyldopa       | <MDL  | <MDL   | <MQL    | 0                       |
| Ramipril         | <MDL  | <MDL   | <MQL    | 9                       |
| Enalapril        | <MDL  | <MDL   | <MQL    | 0                       |
| Carvedilol       | <MDL  | <MDL   | <MQL    | 0                       |
| Atenolol         | <MQL  | 53.7   | 6.68    | 73                      |
| Propranolol      | <MQL  | 0.1    | <MQL    | 0                       |
| Timolol          | <MDL  | <MDL   | <MQL    | 0                       |
| Bisoprolol       | <MQL  | 13.8   | 1.77    | 64                      |
| Pindonol         | <MDL  | <MDL   | <MQL    | 0                       |
| Metoprolol       | <MDL  | 11.4   | 5.18    | 68                      |
| Glibenclamide    | <MDL  | <MDL   | <MQL    | 0                       |
| Gliclazide       | <MDL  | <MDL   | <MQL    | 0                       |
| Glimepiride      | <MDL  | <MDL   | <MQL    | 0                       |
| Glipizide        | <MDL  | <MDL   | <MQL    | 0                       |
| Metformin        | <MQL  | 37.4   | 15.53   | 100                     |
| Repaglinide      | <MDL  | <MDL   | <MQL    | 0                       |
| Guanyllurea (TP) | <MDL  | 141.1  | 52.21   | 100                     |





| PhACs              | Min. | Max.  | Mean   | (%) Detection frequency |
|--------------------|------|-------|--------|-------------------------|
| Ranitidine         | <MDL | <MDL  | <MQL   | 0                       |
| Cimetidine         | <MDL | <MDL  | <MQL   | 0                       |
| Cinnarizine        | <MDL | <MDL  | <MQL   | 0                       |
| Desloratadine      | <MDL | 14.8  | <MQL   | 5                       |
| Cetirizine         | <MQL | 509.8 | 190.94 | 64                      |
| Methdilazine       | <MDL | <MDL  | <MQL   | 0                       |
| Ebastine           | <MDL | <MDL  | <MQL   | 0                       |
| Gabapentin         | <MDL | 640.4 | 84.42  | 27                      |
| Pregabalin         | <MQL | 11.1  | <MQL   | 0                       |
| Carbamazepine      | <MDL | 192.8 | 45.21  | 77                      |
| Lamotrigine        | <MDL | 237.9 | 80.30  | 73                      |
| Clofibricacid      | <MDL | <MDL  | <MQL   | 0                       |
| Atorvastatin       | <MDL | 0.4   | <MQL   | 17                      |
| Bezafibrate        | <MDL | <MDL  | <MQL   | 0                       |
| BP-1               | <MDL | <MDL  | <MQL   | 0                       |
| BP-2               | <MDL | <MDL  | <MQL   | 0                       |
| BP-3               | <MDL | 56.4  | 13.87  | 59                      |
| PABA               | <MDL | 68.6  | 11.56  | 14                      |
| Abacavir           | <MDL | <MDL  | <MQL   | 5                       |
| Acyclovir          | <MDL | <MDL  | <MQL   | 0                       |
| Adefovir           | <MDL | <MDL  | <MQL   | 0                       |
| Valganciclovir     | <MDL | <MDL  | <MQL   | 0                       |
| Lansoprazole       | <MDL | <MDL  | <MQL   | 0                       |
| Omeprazole         | <MDL | 9.2   | <MQL   | 23                      |
| Pantoprazole       | <MQL | 0.2   | <MQL   | 0                       |
| Finasteride        | <MDL | <MDL  | <MQL   | 0                       |
| Prednisolone       | <MDL | <MDL  | <MQL   | 0                       |
| Progesterone       | <MDL | 0.1   | <MQL   | 5                       |
| Orphenadrine       | <MDL | 26.3  | 9.14   | 50                      |
| Solifenacin        | <MDL | <MDL  | <MQL   | 18                      |
| Lidocaine          | <MQL | 4.2   | 0.19   | 14                      |
| Prilocaine         | <MQL | 0.1   | <MQL   | 5                       |
| Prednisolone       | <MDL | 6.3   | <MQL   | 9                       |
| Loperamide         | <MDL | 8.3   | 2.29   | 50                      |
| Fluconazole        | <MDL | 352.5 | 176.35 | 86                      |
| Voriconazole       | <MDL | <MDL  | <MQL   | 0                       |
| Nifedipine         | <MDL | <MDL  | <MQL   | 0                       |
| Diltiazem          | <MQL | 5.0   | <MQL   | 0                       |
| Indapamide         | <MDL | <MDL  | <MQL   | 0                       |
| Furosemide         | <MDL | 25.4  | 2.09   | 32                      |
| Caffeine           | <MDL | 144.8 | 37.40  | 100                     |
| Pramipexole        | <MDL | <MDL  | <MQL   | 0                       |
| Betahistine        | <MDL | 118.7 | 42.39  | 55                      |
| Bromhexine         | <MDL | <MDL  | <MQL   | 0                       |
| Fluticasone        | <MDL | <MDL  | <MQL   | 0                       |
| Levothyroxine (T4) | <MDL | <MDL  | <MQL   | 0                       |



| PhACs         | Min. | Max.  | Mean   | (%) Detection frequency |
|---------------|------|-------|--------|-------------------------|
| Bisacodyl     | <MDL | <MDL  | <MQL   | 0                       |
| Alfuzosin     | <MDL | 4.8   | 1.66   | 50                      |
| Trimetazidine | <MDL | <MDL  | <MQL   | 0                       |
| Raloxifene    | <MDL | <MDL  | <MQL   | 0                       |
| DEET          | <MDL | 522.0 | 186.78 | 82                      |
| Triclosan     | <MDL | 6.4   | 1.02   | 9                       |
| Ergonovine    | <MDL | <MDL  | <MQL   | 0                       |
| Caffeic acid  | <MDL | 35.6  | <MQL   | 17                      |
| Clopidogrel   | <MDL | <MDL  | <MQL   | 0                       |
| Sildenafil    | <MDL | 6.2   | <MQL   | 17                      |
| Dopamine      | <MDL | 91.9  | 18.97  | 41                      |
| Salbutamol    | <MDL | <MDL  | <MQL   | 0                       |

MDL: Method Detection Limit

MQL: Method Quantification Limit

**Table S9** Measured effluent concentrations (ng/L) for the PhACs (i) before (P0), (ii) after the conventional disinfection (by ozonation), and (iii) after different treatment stages (P1, P2, P3) of the pre-industrial level unit (catalyst: zeolite).

| PhAC           | Therapeutic class              | Before ozonation (P0) | After ozonation | P1    | P3   | P4   |
|----------------|--------------------------------|-----------------------|-----------------|-------|------|------|
| Acetaminophen  | Analgesics/<br>muscle relaxant | 104.7                 | <MDL            | 59.1  | <MQL | <MDL |
| Alfuzosin      | Urinary tract drug             | 16.7                  | <MDL            | 4.7   | <MDL | <MDL |
| Amisulpride    | Antipsychotic                  | 538.4                 | <MQL            | 265.9 | <MDL | <MDL |
| Amitriptyline  | Antidepressant                 | <MQL                  | <MDL            | <MQL  | <MDL | <MDL |
| Atenolol       | Beta-blocker                   | 135.5                 | 6.7             | 66.5  | <MDL | 1.8  |
| Azithromycin   | Antibiotic                     | 137                   | <MDL            | 121.1 | <MDL | <MDL |
| Bisoprolol     | Beta-blocker                   | 40                    | <MQL            | 19.6  | <MDL | <MQL |
| BP1            | UV filters                     | <MQL                  | <MQL            | <MQL  | <MDL | <MQL |
| Bromazepam     | Anxiolytic-<br>Sedative        | 2.8                   | <MDL            | <MDL  | <MDL | <MDL |
| Bupropion      | Antidepressant                 | <MQL                  | <MQL            | <MQL  | <MDL | <MDL |
| Caffeic acid   | Boosting<br>supplement         | 33.3                  | <MDL            | 21.7  | <MDL | <MDL |
| Caffeine       | Stimulant                      | 268.9                 | 12.8            | 137.5 | <MDL | 91.2 |
| Carbamazepine  | Anticonvulsant                 | 233.8                 | <MDL            | 136.7 | <MDL | <MQL |
| Celecoxib      | NSAID                          | <MQL                  | <MDL            | <MQL  | <MDL | <MDL |
| Cetirizine     | Antihistamine                  | 536                   | <MQL            | 412.7 | <MDL | <MQL |
| Ciprofloxacin  | Antibiotic                     | 158.8                 | 21.5            | 147   | 21.4 | 21.4 |
| Citalopram     | Antidepressant                 | 31.1                  | <MDL            | 10    | <MDL | <MDL |
| Clarithromycin | Antibiotic                     | 102.4                 | <MDL            | 97.3  | <MDL | <MDL |
| Clindamycin    | Antibiotic                     | 20                    | <MDL            | 13    | <MDL | <MDL |
| Clopidogrel    | Antiplatelet                   | 10.6                  | <MDL            | 2.8   | <MDL | <MDL |
| DEET           | Insect repellent               | 2.6                   | 2.7             | 14.5  | <MQL | 0.7  |





| PhAC               | Therapeutic class              | Before ozonation (P0) | After ozonation | P1     | P3   | P4    |
|--------------------|--------------------------------|-----------------------|-----------------|--------|------|-------|
| Diazepam           | Anxiolytic-Sedative            | <MQL                  | <MQL            | <MQL   | <MQL | <MQL  |
| Diclofenac         | NSAID                          | 555.7                 | <MDL            | 334.1  | <MDL | <MDL  |
| Diltiazem          | Calcium channel blocker        | <MQL                  | <MQL            | <MQL   | <MDL | <MQL  |
| Erythromycin       | Antibiotic                     | 112.5                 | <MDL            | 91.1   | <MDL | <MQL  |
| Etoricoxib         | NSAID                          | <MQL                  | <MQL            | <MQL   | <MDL | <MQL  |
| Fluconazole        | Antifungal                     | 199.2                 | 106.4           | 162    | <MDL | 65.7  |
| Furosemide         | Diuretic                       | 721.9                 | <MDL            | 398.8  | <MDL | <MDL  |
| Gliclazide         | Antidiabetic                   | 5.8                   | <MDL            | <MQL   | <MDL | <MDL  |
| Glimepiride        | Antidiabetic                   | <MDL                  | <MDL            | <MDL   | <MDL | <MDL  |
| Glipizide          | Antidiabetic                   | <MDL                  | <MDL            | <MDL   | <MDL | 2.8   |
| Ibuprofen          | NSAID                          | <MQL                  | <MQL            | <MQL   | <MDL | <MQL  |
| Irbesartan         | Antihypertensive               | 5565.4                | 1829.3          | 4904.8 | <MQL | 867.8 |
| Ketoprofen         | NSAID                          | 18                    | 21.1            | 0.8    | <MQL | <MQL  |
| Lamotrigine        | Anticonvulsant                 | 529.5                 | 237.9           | 334    | <MDL | 27.9  |
| Levofloxacin       | Antibiotic                     | 69.2                  | <MDL            | 44.7   | <MDL | <MDL  |
| Levothyroxine (T4) | Thyroid hormone                | <MDL                  | <MDL            | <MDL   | <MDL | <MDL  |
| Lidocaine          | Anesthetic                     | 88.8                  | <MQL            | 42.8   | <MQL | <MQL  |
| Lincomycin         | Antibiotic                     | <MQL                  | <MDL            | <MQL   | <MDL | <MDL  |
| Losartan           | Antihypertensive               | 188.5                 | <MDL            | 125.8  | <MDL | <MDL  |
| Metformin          | Antidiabetic                   | <MQL                  | <MQL            | 6.4    | <MDL | 29.4  |
| Metronidazole      | Antibiotic                     | 35.1                  | 12.6            | 29.7   | <MDL | 7.6   |
| Moxifloxacin       | Antibiotic                     | 21.8                  | <MDL            | 23.2   | <MDL | 27.8  |
| Naproxen           | NSAID                          | <MDL                  | <MDL            | <MQL   | <MQL | <MQL  |
| Nimesulide         | NSAID                          | <MQL                  | <MQL            | <MQL   | <MDL | <MQL  |
| Omeprazole         | Proton pump inhibitor          | 2547.7                | <MDL            | 1029.5 | <MDL | <MDL  |
| Orphenadrine       | Analgesics/<br>muscle relaxant | 105.6                 | <MDL            | 53     | <MDL | <MDL  |
| Pantoprazole       | Proton pump inhibitor          | 11.8                  | <MQL            | 3.8    | <MDL | <MDL  |
| Pindolol           | Beta-blocker                   | <MQL                  | <MQL            | <MQL   | <MDL | <MQL  |
| Pregabalin         | Anticonvulsant                 | <MQL                  | <MQL            | <MQL   | <MDL | <MDL  |
| Prilocaine         | Anesthetic                     | <MQL                  | <MQL            | <MQL   | <MDL | <MQL  |
| Progesterone       | Urinary tract drug             | 1.2                   | <MQL            | 2      | <MDL | <MQL  |
| Propranolol        | Beta-blocker                   | <MQL                  | <MQL            | <MQL   | <MDL | <MQL  |
| Repaglinide        | Antidiabetic                   | <MDL                  | <MDL            | <MDL   | <MDL | <MDL  |
| Risperidone        | Antipsychotic                  | <MQL                  | <MQL            | <MQL   | <MQL | <MQL  |
| Rosuvastatin       | Lipid regulator                | 83.3                  | 13.4            | 60.4   | <MDL | 10.7  |
| Sertraline         | Antidepressant                 | <MQL                  | <MDL            | <MQL   | <MDL | <MDL  |
| Sulfamethoxazole   | Antibiotic                     | 40.5                  | 2.5             | 80.8   | <MDL | <MDL  |
| Telmisartan        | Antihypertensive               | 77.1                  | 33.8            | 72.5   | <MQL | <MQL  |



| PhAC         | Therapeutic class | Before ozonation (P0) | After ozonation | P1     | P3   | P4    |
|--------------|-------------------|-----------------------|-----------------|--------|------|-------|
| Triclosan    | Antiseptic        | 45.6                  | 6.4             | 15.4   | <MQL | 5.8   |
| Trimethoprim | Antibiotic        | <MQL                  | <MQL            | <MQL   | <MQL | <MQL  |
| Valsartan    | Antihypertensive  | 4829.5                | 1351.6          | 1965.2 | <MQL | 336.3 |
| Venlafaxine  | Antidepressant    | 270.4                 | <MQL            | 182    | <MQL | <MQL  |

P1: Effluent wastewater after the post filtration (1st Fix-Bed) in the pre-industrial pilot unit

P3: Effluent wastewater after the catalytic ozonation (2nd Fix-Bed) in the pre-industrial pilot unit

P4: Effluent wastewater after the biological stabilization (3rd Fix-Bed) in the pre-industrial pilot unit

MDL: Method Detection Limit

MQL: Method Quantification Limit

**Table S10** Measured effluent concentrations (ng/L) for the PhACs (i) before (P0), (ii) after the conventional disinfection (by ozonation), and (iii) after different treatment stages (P1, P2, P3) of the pre-industrial level unit (catalyst: PET).

| Emerging contaminant | Therapeutic class              | Before ozonation (P0) | After ozonation | P1     | P3     | P4    |
|----------------------|--------------------------------|-----------------------|-----------------|--------|--------|-------|
| Acetaminophen        | Analgesics/<br>muscle relaxant | 68.7                  | 20.9            | 34.8   | 149.9  | 34.8  |
| Alfuzosine           | $\alpha$ 1-antagonist          | <MQL                  | <MDL            | <MDL   | <MDL   | <MDL  |
| Amisulpride          | Antipsychotic                  | 732.4                 | <MDL            | 428.1  | <MDL   | <MDL  |
| Amitriptyline        | Antidepressant                 | <MQL                  | <MDL            | <MDL   | <MDL   | <MDL  |
| Amoxicillin          | Antibiotic                     | <MDL                  | <MDL            | <MQL   | <MDL   | <MDL  |
| Atenolol             | Beta-blocker                   | 60.4                  | <MQL            | 66.1   | 268.0  | <MQL  |
| Azithromycin         | Antibiotic                     | <MDL                  | <MDL            | <MDL   | <MDL   | <MDL  |
| Bisoprolol           | Beta-blocker                   | 53.4                  | 13.8            | 31.7   | <MDL   | <MDL  |
| BP1                  | UV filters                     | <MQL                  | <MDL            | <MDL   | <MDL   | <MQL  |
| Caffeine             | Stimulant                      | 386.6                 | 58.5            | 186.4  | 33.0   | 92.3  |
| Carbamazepine        | Anticonvulsant                 | 655.4                 | 192.8           | 423.1  | 128.4  | 76.6  |
| Cetirizine           | Antihistamine                  | 600.5                 | <MDL            | 495.2  | <MDL   | <MDL  |
| Ciprofloxacin        | Antibiotic                     | 77.1                  | <MDL            | 60.2   | 37.5   | <MDL  |
| Citalopram           | Antidepressant                 | 103.3                 | <MDL            | 4.5    | 36.2   | <MDL  |
| Clarithromycin       | Antibiotic                     | 45.2                  | <MDL            | 29.7   | <MDL   | <MDL  |
| Clofibric Acid       | Lipid regulator                | 11.7                  | 12.2            | 12.1   | 11.9   | 12.4  |
| Cytarabine           | Cytostatic                     | <MDL                  | 13.8            | <MDL   | 10.9   | <MDL  |
| DEET                 | Insect repellent               | 37.1                  | 4.4             | 27.8   | 1.8    | 1.7   |
| Desloratadine        | Antihistamine                  | 58.8                  | <MDL            | 24.5   | <MDL   | 21.9  |
| Diclofenac           | NSAID                          | 4154.0                | <MQL            | 4485.0 | 266.7  | 0.2   |
| Dopamine             | Neuromodulator<br>y            | 734.7                 | 490.1           | 574.0  | <MDL   | <MDL  |
| Duloxetine           | Antidepressant                 | <MDL                  | 17.2            | <MDL   | 3.9    | 9.6   |
| Erythromycin-H2O     | Antibiotic                     | <MDL                  | <MQL            | <MQL   | <MQL   | <MQL  |
| Fluconazole          | Antifungal                     | 234.9                 | 146.1           | 192.4  | 149.5  | 101.3 |
| Gabapentin           | Anticonvulsant                 | 1493.2                | 640.4           | 655.6  | 1893.6 | 934.2 |
| Glibenclamide        | Antidiabetic                   | <MQL                  | <MDL            | <MQL   | <MQL   | <MDL  |



| Emerging contaminant | Therapeutic class              | Before ozonation (P0) | After ozonation | P1     | P3     | P4    |
|----------------------|--------------------------------|-----------------------|-----------------|--------|--------|-------|
| Glimepiride          | Antidiabetic                   | <MQL                  | <MDL            | <MQL   | <MDL   | <MQL  |
| Ibuprofen            | NSAID                          | <MQL                  | <MQL            | <MQL   | <MQL   | <MQL  |
| Indomethacin         | NSAID                          | 5.9                   | <MDL            | <MQL   | <MQL   | <MDL  |
| Irbesartan           | Antihypertensive               | 7464.4                | 2161.8          | 6613.7 | 2174.5 | 830.7 |
| Ketoprofen           | NSAID                          | 37.5                  | 26.0            | 15.4   | 753.3  | 15.2  |
| Lamotrigine          | Anticonvulsant                 | 372.9                 | 199.8           | 246.9  | 266.2  | 54.0  |
| Lansoprazole         | Antiulcer                      | 135.2                 | <MDL            | 36.1   | <MDL   | <MDL  |
| Levofloxacin         | Antibiotic                     | 54.0                  | <MDL            | 39.0   | <MDL   | <MDL  |
| Lidocaine            | Anesthetic                     | 146.4                 | <MQL            | 80.7   | <MQL   | <MQL  |
| Losartan             | Antihypertensive               | 268.1                 | <MQL            | 213.4  | <MQL   | <MQL  |
| Metformin            | Antidiabetic                   | <MQL                  | <MQL            | <MQL   | <MQL   | <MQL  |
| Metoprolol           | $\beta$ blocker                | 313.9                 | <MDL            | 186.7  | <MDL   | <MDL  |
| Metronidazole        | Antibiotic                     | 79.8                  | 14.5            | 123.7  | 311.9  | 2.1   |
| Moxifloxacin         | Antibiotic                     | 2015.2                | 9.5             | 40.6   | 55.9   | 9.6   |
| Naproxen             | NSAID                          | 34.9                  | 14.8            | 27.5   | 16.3   | 17.7  |
| Norfloxacin          | Antibiotic                     | 42.7                  | 44.9            | 39.9   | 42.6   | <MDL  |
| Orphenadrine         | Analgesics/<br>muscle relaxant | 156.7                 | <MDL            | 81.0   | <MDL   | <MDL  |
| PABA                 | UV-filter                      | 47.2                  | 68.6            | 16.2   | 71.1   | 15.1  |
| Piracetam            | Nootropic                      | 335.2                 | 231.7           | 247.9  | 286.3  | 178.9 |
| Prednisolone         | Corticosteroid hormone         | <MDL                  | <MDL            | <MDL   | 120.8  | <MDL  |
| Pregabalin           | Anticonvulsant                 | 60.7                  | 11.1            | 33.4   | 14.1   | 10.0  |
| Prilocaine           | Anesthetic                     | <MQL                  | <MDL            | <MDL   | <MDL   | <MDL  |
| Progesterone         | Urinary tract drug             | <MDL                  | <MQL            | <MDL   | <MQL   | 38.5  |
| Propranolol          | Beta-blocker                   | <MQL                  | <MDL            | <MDL   | <MDL   | <MDL  |
| Quetiapine           | Antipsychotic                  | <MDL                  | <MDL            | <MDL   | <MDL   | <MDL  |
| Ramipril             | Antihypertensive               | <MDL                  | <MDL            | <MDL   | <MDL   | <MDL  |
| Rosuvastatin         | Lipid regulator                | 526.6                 | 80.4            | 348.5  | 40.1   | <MDL  |
| Salbutamol           | $\beta$ 2 antagonist           | <MDL                  | 15.8            | <MDL   | 26.2   | 23.5  |
| Sulfamethoxazole     | Antibiotic                     | 65.9                  | <MDL            | 75.0   | <MDL   | <MDL  |
| Tamoxifen            | Cytostatic                     | <MDL                  | <MDL            | <MDL   | <MDL   | <MDL  |
| Telmisartan          | Antihypertensive               | 1146.8                | 96.4            | 916.3  | 15.3   | 0.1   |
| Tramadol             | Analgesic                      | 874.9                 | <MDL            | 646.5  | <MDL   | <MDL  |
| Trimethoprim         | Antibiotic                     | <MQL                  | <MQL            | <MQL   | 399.4  | <MQL  |
| Valsartan            | Antihypertensive               | 11364.0               | 3340.2          | 8494.1 | 2975.4 | 849.7 |
| Venlafaxine          | Antidepressant                 | 352.1                 | <MDL            | 234.1  | 240.3  | <MDL  |

P1: Effluent wastewater after the post filtration (1st Fix-Bed) in the pre-industrial pilot unit

P3: Effluent wastewater after the catalytic ozonation (2nd Fix-Bed) in the pre-industrial pilot unit

P4: Effluent wastewater after the biological stabilization (3rd Fix-Bed) in the pre-industrial pilot unit

MDL: Method Detection Limit

MQL: Method Quantification Limit

### Section S3. Supplementary Figures

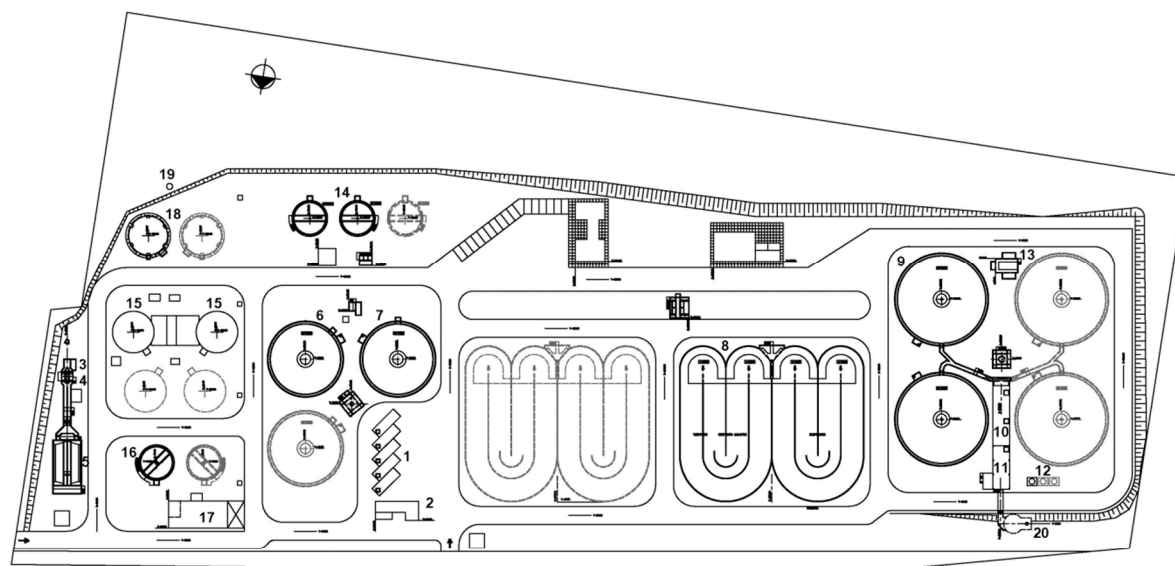

#### GENERAL ARRANGEMENT PLAN LEGEND

- 1 SEPTIC WASTEWATER RECEPTION STATION
- 2 SEPTIC WASTEWATER PRETREATMENT UNIT
- 3 INFLOW CHAMBER
- 4 SCREENING STATION
- 5 GRIT & GREASE REMOVAL
- 6 PST (PRIMARY SEDIMENTATION TANK)
- 7 SEPTIC WASTEWATER BALANCING TANK
- 8 BIOREACTOR
- 9 FST (FINAL SEDIMENTATION TANK)

- 10 OZONE CONTACT UNIT
- 11 OZONE PRODUCTION STATION
- 12 LIQUID OXYGEN STORAGE TANK
- 13 RAS & SAS PUMPING STATION
- 14 SLUDGE THICKENERS
- 15 ANAEROBIC SLUDGE DIGESTERS
- 16 SLUDGE POST-THICKENER
- 17 SLUDGE DEWATERING STATION
- 18 GAS HOLDER
- 19 GAS FLARE
- 20 EFFLUENT CHAMBER

#### LINE'S LEGEND

- OPERATING UNITS  
 - - - FUTURE UNITS

(a)

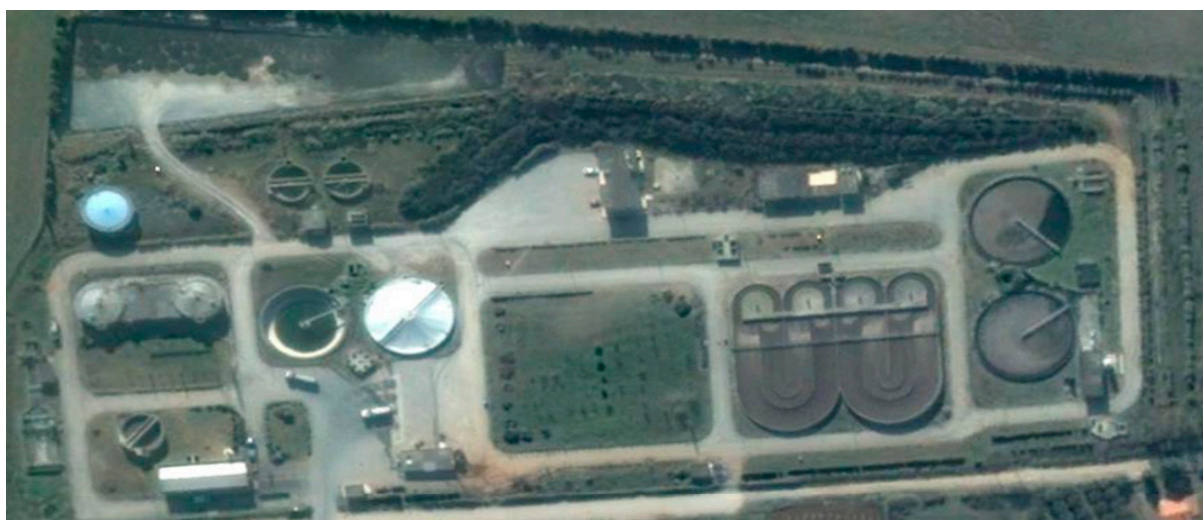

(b)

Figure S1 Diagram (a) and view (b) of wastewater treatment plant "AINEIAS"



## Entrance- Influent of WWTP

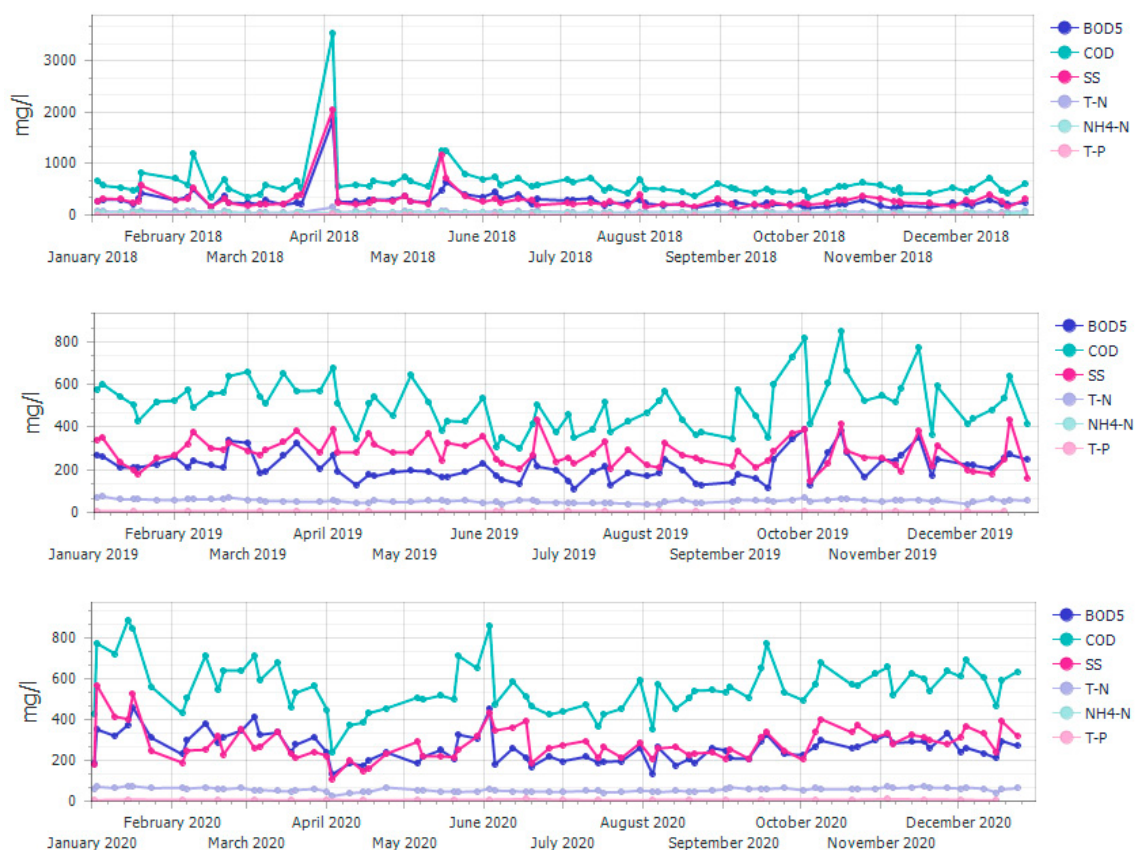

**Figure S2** Variation of BOD<sub>5</sub>, COD, SS, T-N, NH<sub>4</sub>-N, NO<sub>3</sub>-N and T-P at the entrance of WWTP for 2018-2020

(Data obtained from <http://astikalimata.ypeka.gr/Services/Pages/WtpViewApp.aspx#>)

## Treated outflow-Effluent of WWTP

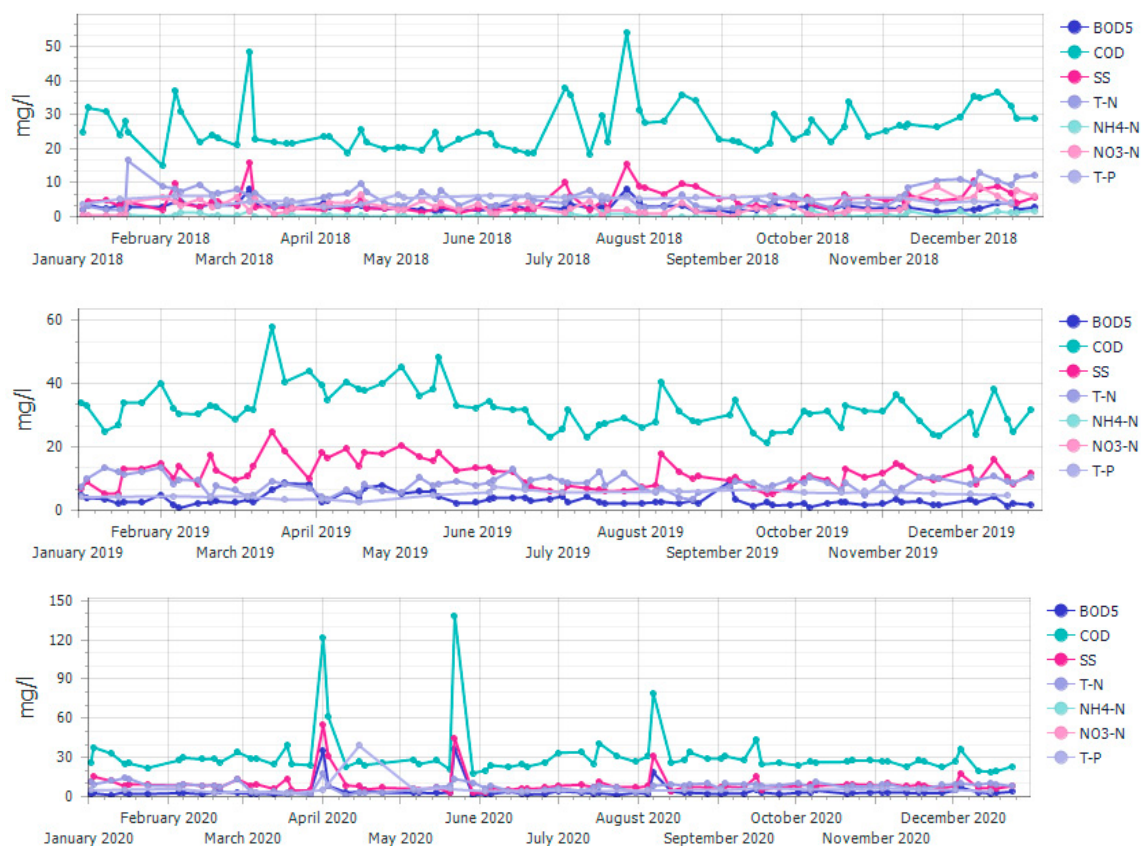

**Figure S3** Variation of BOD<sub>5</sub>, COD, SS, T-N, NH<sub>4</sub>-N, NO<sub>3</sub>-N and T-P at the treated outflow of WWTP for 2018-2020

(Data obtained from <http://astikalimata.ypeka.gr/Services/Pages/WtpViewApp.aspx#>)

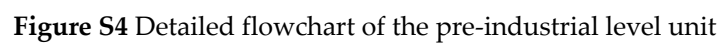

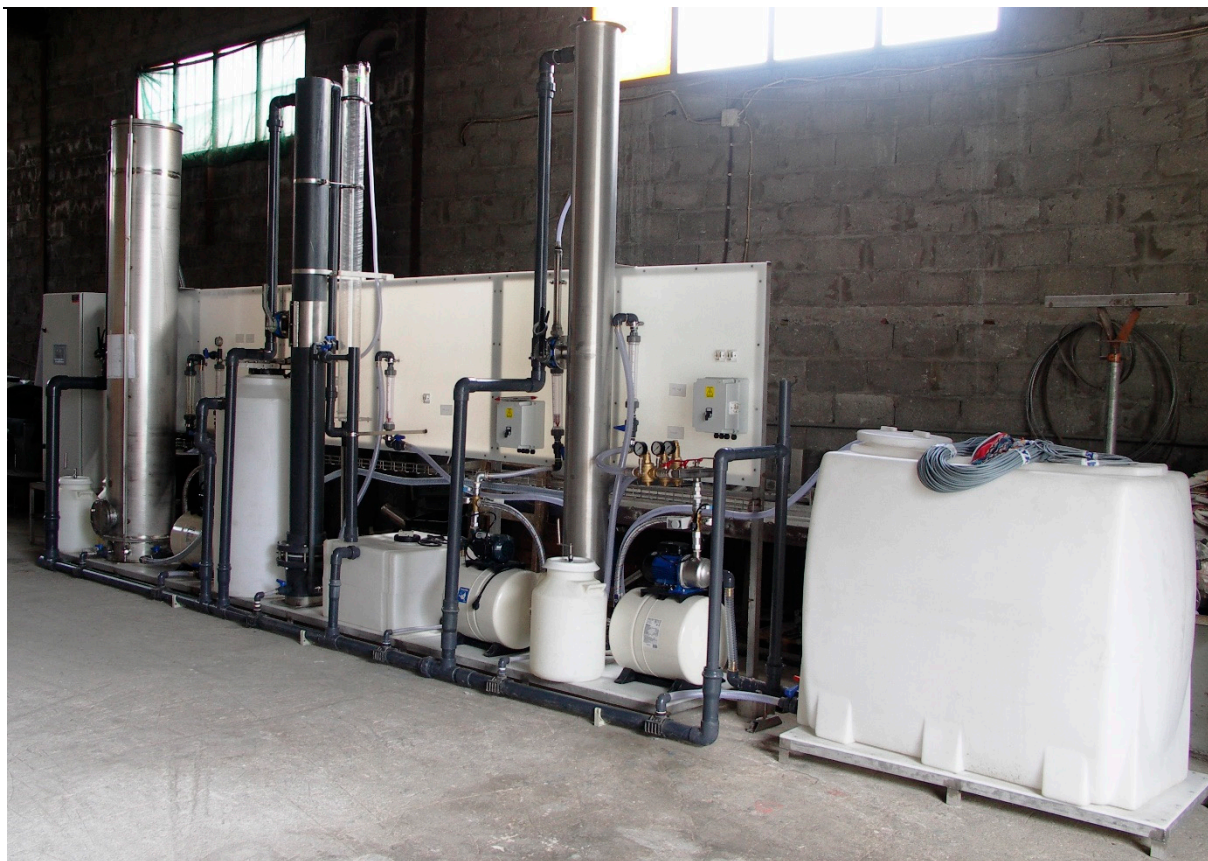

**Figure S5** Photograph of the pre-industrial level unit
